# Supplementary material for: Altered Fecal Metabolites and Colonic Glycerophospholipids Were Associated With Abnormal Composition of Gut Microbiota in a Depression Model of Mice
Source: PubMed Central journal article supplement (PMC8326978; doi:10.3389/fnins.2021.701355), 2021-07-19
Supplement: Data_Sheet_1.pdf [file Data_Sheet_1.pdf]

**Supplementary Table S1. The taxonomy annotations of identified gut microbial OTU in the control and CSDS mice.**

| OTU    | Phylum             | Class                  | Order                 | Family                      | Genus                                      | Species                                                            |
|--------|--------------------|------------------------|-----------------------|-----------------------------|--------------------------------------------|--------------------------------------------------------------------|
| OTU700 | p__Firmicutes      | c__Clostridia          | o__Clostridiales      | f__Lachnospirae             | g__Lachnospiraceae_NK4A136_group           | s__unclassified_g__Lachnospiraceae_NK4A136_group                   |
| OTU345 | p__Firmicutes      | c__Clostridia          | o__Clostridiales      | f__Clostridiaceae           | g__Clostridium_sensu_stricto_1             | s__Clostridium_sp._ND2                                             |
| OTU622 | p__Firmicutes      | c__Clostridia          | o__Clostridiales      | f__Lachnospirae             | g__unclassified_f__Lachnospiraceae         | s__unclassified_f__Lachnospiraceae                                 |
| OTU185 | p__Firmicutes      | c__Clostridia          | o__Clostridiales      | f__Clostridiales            | g__norank_f__Clostridiales_vadinBB60_group | s__unclassified_g__norank_f__Clostridiales_vadinBB60_group         |
| OTU682 | p__Firmicutes      | c__Clostridia          | o__Clostridiales      | f__Lachnospirae             | g__unclassified_f__Lachnospiraceae         | s__unclassified_f__Lachnospiraceae                                 |
| OTU685 | p__Firmicutes      | c__Clostridia          | o__Clostridiales      | f__Lachnospirae             | g__unclassified_f__Lachnospiraceae         | s__unclassified_f__Lachnospiraceae                                 |
| OTU423 | p__Spirochaeta     | c__Spirochaete         | o__Spirochaetales     | f__Brachyspiraceae          | g__Brachyspira                             | s__unclassified_g__Brachyspira                                     |
| OTU263 | p__Firmicutes      | c__Clostridia          | o__Clostridiales      | f__Ruminococcaceae          | g__Ruminococcaceae_UCG-014                 | s__uncultured_organism_g__Ruminococcaceae_UCG-014                  |
| OTU99  | p__Firmicutes      | c__Clostridia          | o__Clostridiales      | f__Lachnospirae             | g__[Ruminococcus]_torques_group            | s__uncultured_bacterium_g__[Ruminococcus]_torques_group            |
| OTU525 | p__Firmicutes      | c__Clostridia          | o__Clostridiales      | f__Clostridiales            | g__norank_f__Clostridiales_vadinBB60_group | s__unclassified_g__norank_f__Clostridiales_vadinBB60_group         |
| OTU418 | p__Firmicutes      | c__Clostridia          | o__Clostridiales      | f__Lachnospirae             | g__Roseburia                               | s__Lachnospiraceae_bacterium_DW52                                  |
| OTU100 | p__Firmicutes      | c__Clostridia          | o__Clostridiales      | f__Ruminococcaceae          | g__Ruminococcaceae_UCG-014                 | s__uncultured_bacterium_g__Ruminococcaceae_UCG-014                 |
| OTU210 | p__Firmicutes      | c__Clostridia          | o__Clostridiales      | f__Clostridiales            | g__norank_f__Clostridiales_vadinBB60_group | s__uncultured_bacterium_g__norank_f__Clostridiales_vadinBB60_group |
| OTU80  | p__Firmicutes      | c__Clostridia          | o__Clostridiales      | f__Ruminococcaceae          | g__Ruminococcaceae_UCG-013                 | s__unclassified_g__Ruminococcaceae_UCG-013                         |
| OTU654 | p__Bacteroidetes   | c__Bacteroidia         | o__Bacteroidales      | f__Prevotellaceae           | g__unclassified_f__Prevotellaceae          | s__unclassified_f__Prevotellaceae                                  |
| OTU325 | p__Firmicutes      | c__Negativicutes       | o__Selenomonadales    | f__Veillonellaceae          | g__Quinella                                | s__uncultured_bacterium_g__Quinella                                |
| OTU158 | p__Firmicutes      | c__Clostridia          | o__Clostridiales      | f__Clostridiales            | g__norank_f__Clostridiales_vadinBB60_group | s__unclassified_g__norank_f__Clostridiales_vadinBB60_group         |
| OTU483 | p__Firmicutes      | c__Clostridia          | o__Clostridiales      | f__Lachnospirae             | g__Lachnospiraceae_NK4A136_group           | s__unclassified_g__Lachnospiraceae_NK4A136_group                   |
| OTU131 | p__Firmicutes      | c__Clostridia          | o__Clostridiales      | f__Lachnospirae             | g__Lachnospiraceae_UCG-001                 | s__unclassified_g__Lachnospiraceae_UCG-001                         |
| OTU456 | p__Firmicutes      | c__Clostridia          | o__Clostridiales      | f__Lachnospirae             | g__Lachnospiraceae_NK4A136_group           | s__uncultured_bacterium_g__Lachnospiraceae_NK4A136_group           |
| OTU698 | p__Firmicutes      | c__Clostridia          | o__Clostridiales      | f__Ruminococcaceae          | g__Anaerotruncus                           | s__uncultured_bacterium_g__Anaerotruncus                           |
| OTU291 | p__Firmicutes      | c__Clostridia          | o__Clostridiales      | f__Family_XIII              | g__Family_XIII_AD3011_group                | s__unclassified_g__Family_XIII_AD3011_group                        |
| OTU390 | p__Firmicutes      | c__Clostridia          | o__Clostridiales      | f__Peptococcaceae           | g__norank_f__Peptococcaceae                | s__unclassified_g__norank_f__Peptococcaceae                        |
| OTU706 | p__Proteobacteria  | c__Deltaproteobacteria | o__Desulfovibrionales | f__Desulfovibrionaceae      | g__Bilophila                               | s__uncultured_bacterium_g__Bilophila                               |
| OTU498 | p__Bacteroidetes   | c__Bacteroidia         | o__Bacteroidales      | f__Prevotellaceae           | g__Prevotellaceae_UCG-003                  | s__unclassified_g__Prevotellaceae_UCG-003                          |
| OTU71  | p__Firmicutes      | c__Clostridia          | o__Clostridiales      | f__Ruminococcaceae          | g__unclassified_f__Ruminococcaceae         | s__unclassified_f__Ruminococcaceae                                 |
| OTU350 | p__Firmicutes      | c__Bacilli             | o__Lactobacillales    | f__Lactobacillaceae         | g__Lactobacillus                           | s__unclassified_g__Lactobacillus                                   |
| OTU246 | p__Firmicutes      | c__Clostridia          | o__Clostridiales      | f__Lachnospirae             | g__Roseburia                               | s__unclassified_g__Roseburia                                       |
| OTU385 | p__Tenericutes     | c__Mollicutes          | o__Mollicutes         | f__norank_o__Mollicutes_RF9 | g__norank_o__Mollicutes_RF9                | s__unclassified_g__norank_o__Mollicutes_RF9                        |
| OTU77  | p__Firmicutes      | c__Clostridia          | o__Clostridiales      | f__Ruminococcaceae          | g__unclassified_f__Ruminococcaceae         | s__unclassified_f__Ruminococcaceae                                 |
| OTU712 | p__Bacteroidetes   | c__Bacteroidia         | o__Bacteroidales      | f__Bacteroidales            | g__norank_f__Bacteroidales_S24-7_group     | s__unclassified_g__norank_f__Bacteroidales_S24-7_group             |
| OTU274 | p__Deferribacteres | c__Deferribacteres     | o__Deferribacteres    | f__Deferribacteres          | g__Mucispirillum                           | s__unclassified_g__Mucispirillum                                   |
| OTU553 | p__Tenericutes     | c__Mollicutes          | o__Mollicutes         | f__norank_o__Mollicutes_RF9 | g__norank_o__Mollicutes_RF9                | s__uncultured_bacterium_g__norank_o__Mollicutes_RF9                |
| OTU384 | p__Firmicutes      | c__Clostridia          | o__Clostridiales      | f__Lachnospirae             | g__Lachnospiraceae_NK4A136_group           | s__unclassified_g__Lachnospiraceae_NK4A136_group                   |
| OTU136 | p__Firmicutes      | c__Clostridia          | o__Clostridiales      | f__Lachnospirae             | g__norank_f__Lachnospiraceae               | s__unclassified_g__norank_f__Lachnospiraceae                       |
| OTU30  | p__Bacteroidetes   | c__Bacteroidia         | o__Bacteroidales      | f__Rikenellaceae            | g__Rikenellaceae_RC9_gut_group             | s__unclassified_g__Rikenellaceae_RC9_gut_group                     |

|        |                 |                 |                   |                  |                                            |                                                            |
|--------|-----------------|-----------------|-------------------|------------------|--------------------------------------------|------------------------------------------------------------|
| OTU126 | p__Firmicutes   | c__Clostridia   | o__Clostridiales  | f__Ruminococc    | g__[Eubacterium]_coprostanoligenes_group   | s__gut_metagenome_g__[Eubacterium]_coprostanoligenes_g     |
| OTU162 | p__Firmicutes   | c__Clostridia   | o__Clostridiales  | f__Ruminococc    | g__Caproiciproducens                       | s__unclassified_g__Caproiciproducens                       |
| OTU702 | p__Firmicutes   | c__Clostridia   | o__Clostridiales  | f__Ruminococc    | g__Ruminiclostridium_5                     | s__unclassified_g__Ruminiclostridium_5                     |
| OTU221 | p__Firmicutes   | c__Erysipelotri | o__Erysipelotricl | f__Erysipelotric | g__Holdemanella                            | s__uncultured_bacterium_g__Holdemanella                    |
| OTU715 | p__Bacteroidet  | c__Bacteroidia  | o__Bacteroidales  | f__Bacteroidale  | g__norank_f__Bacteroidales_S24-7_group     | s__unclassified_g__norank_f__Bacteroidales_S24-7_group     |
| OTU271 | p__Firmicutes   | c__Clostridia   | o__Clostridiales  | f__Lachnospira   | g__[Eubacterium]_ventriosum_group          | s__uncultured_organism_g__[Eubacterium]_ventriosum_grou    |
| OTU294 | p__Firmicutes   | c__Clostridia   | o__Clostridiales  | f__Ruminococc    | g__unclassified_f__Ruminococcaceae         | s__unclassified_f__Ruminococcaceae                         |
| OTU664 | p__Firmicutes   | c__Clostridia   | o__Clostridiales  | f__Lachnospira   | g__unclassified_f__Lachnospiraceae         | s__unclassified_f__Lachnospiraceae                         |
| OTU548 | p__Bacteroidet  | c__Bacteroidia  | o__Bacteroidales  | f__Porphyromo    | g__Odoribacter                             | s__uncultured_bacterium_g__Odoribacter                     |
| OTU632 | p__Firmicutes   | c__Clostridia   | o__Clostridiales  | f__Ruminococc    | g__Anaerotruncus                           | s__unclassified_g__Anaerotruncus                           |
| OTU431 | p__Bacteroidet  | c__Bacteroidia  | o__Bacteroidales  | f__Bacteroidale  | g__norank_f__Bacteroidales_S24-7_group     | s__uncultured_bacterium_g__norank_f__Bacteroidales_S24-7   |
| OTU213 | p__Bacteroidet  | c__Bacteroidia  | o__Bacteroidales  | f__Prevotellace  | g__Prevotellaceae_UCG-001                  | s__uncultured_Bacteroidales_bacterium_g__Prevotellaceae_U  |
| OTU64  | p__Firmicutes   | c__Clostridia   | o__Clostridiales  | f__Lachnospira   | g__Roseburia                               | s__unclassified_g__Roseburia                               |
| OTU663 | p__Firmicutes   | c__Clostridia   | o__Clostridiales  | f__Lachnospira   | g__unclassified_f__Lachnospiraceae         | s__unclassified_f__Lachnospiraceae                         |
| OTU349 | p__Bacteroidet  | c__Bacteroidia  | o__Bacteroidales  | f__Bacteroidace  | g__Bacteroides                             | s__Bacteroides_vulgatus_ATCC_8482                          |
| OTU261 | p__unclassified | c__unclassified | o__unclassified_l | f__unclassified  | g__unclassified_k__norank                  | s__unclassified_k__norank                                  |
| OTU307 | p__Actinobacte  | c__Actinobacte  | o__Coriobacteria  | f__Coriobacteri  | g__Adlercreutzia                           | s__uncultured_bacterium_g__Adlercreutzia                   |
| OTU54  | p__Bacteroidet  | c__Bacteroidia  | o__Bacteroidales  | f__Bacteroidale  | g__norank_f__Bacteroidales_S24-7_group     | s__uncultured_bacterium_g__norank_f__Bacteroidales_S24-7   |
| OTU703 | p__Firmicutes   | c__Clostridia   | o__Clostridiales  | f__Lachnospira   | g__Lachnospiraceae_NK4A136_group           | s__unclassified_g__Lachnospiraceae_NK4A136_group           |
| OTU72  | p__Firmicutes   | c__Clostridia   | o__Clostridiales  | f__Ruminococc    | g__norank_f__Ruminococcaceae               | s__[Clostridium]_leptum_g__norank                          |
| OTU91  | p__Firmicutes   | c__Clostridia   | o__Clostridiales  | f__Clostridiales | g__norank_f__Clostridiales_vadinBB60_group | s__unclassified_g__norank_f__Clostridiales_vadinBB60_gro   |
| OTU537 | p__Bacteroidet  | c__Bacteroidia  | o__Bacteroidales  | f__Bacteroidale  | g__norank_f__Bacteroidales_S24-7_group     | s__uncultured_bacterium_g__norank_f__Bacteroidales_S24-7   |
| OTU48  | p__Bacteroidet  | c__Bacteroidia  | o__Bacteroidales  | f__unclassified  | g__unclassified_o__Bacteroidales           | s__unclassified_o__Bacteroidales                           |
| OTU555 | p__Firmicutes   | c__Clostridia   | o__Clostridiales  | f__Lachnospira   | g__norank_f__Lachnospiraceae               | s__unclassified_g__norank_f__Lachnospiraceae               |
| OTU62  | p__Firmicutes   | c__Clostridia   | o__Clostridiales  | f__Lachnospira   | g__Roseburia                               | s__unclassified_g__Roseburia                               |
| OTU354 | p__Firmicutes   | c__Clostridia   | o__Clostridiales  | f__Lachnospira   | g__Lachnospiraceae_NK4A136_group           | s__uncultured_bacterium_g__Lachnospiraceae_NK4A136_gr      |
| OTU656 | p__Proteobacte  | c__Alphaproteo  | o__Rhodospirilla  | f__Rhodospirill  | g__norank_f__Rhodospirillaceae             | s__gut_metagenome_g__norank_f__Rhodospirillaceae           |
| OTU270 | p__Bacteroidet  | c__Bacteroidia  | o__Bacteroidales  | f__Bacteroidale  | g__norank_f__Bacteroidales_S24-7_group     | s__uncultured_Bacteroidales_bacterium_g__norank_f__Bacte   |
| OTU135 | p__Firmicutes   | c__Clostridia   | o__Clostridiales  | f__Lachnospira   | g__unclassified_f__Lachnospiraceae         | s__unclassified_f__Lachnospiraceae                         |
| OTU550 | p__Firmicutes   | c__Erysipelotri | o__Erysipelotricl | f__Erysipelotric | g__Candidatus_Stoquefichus                 | s__uncultured_bacterium_g__Candidatus_Stoquefichus         |
| OTU53  | p__Bacteroidet  | c__Bacteroidia  | o__Bacteroidales  | f__Bacteroidale  | g__norank_f__Bacteroidales_S24-7_group     | s__uncultured_bacterium_g__norank_f__Bacteroidales_S24-7   |
| OTU683 | p__Firmicutes   | c__Clostridia   | o__Clostridiales  | f__Ruminococc    | g__Ruminococcaceae_UCG-014                 | s__unclassified_g__Ruminococcaceae_UCG-014                 |
| OTU281 | p__Proteobacte  | c__Deltaproteo  | o__Desulfovibric  | f__Desulfovibri  | g__Desulfovibrio                           | s__uncultured_Desulfovibrionales_bacterium_g__Desulfovibri |
| OTU541 | p__Firmicutes   | c__Clostridia   | o__Clostridiales  | f__Ruminococc    | g__Ruminococcaceae_UCG-014                 | s__unclassified_g__Ruminococcaceae_UCG-014                 |
| OTU21  | p__Firmicutes   | c__Clostridia   | o__Clostridiales  | f__Ruminococc    | g__Ruminococcaceae_UCG-010                 | s__unclassified_g__Ruminococcaceae_UCG-010                 |
| OTU627 | p__Bacteroidet  | c__Bacteroidia  | o__Bacteroidales  | f__Bacteroidale  | g__norank_f__Bacteroidales_S24-7_group     | s__uncultured_bacterium_g__norank_f__Bacteroidales_S24-7   |
| OTU164 | p__Firmicutes   | c__Clostridia   | o__Clostridiales  | f__Ruminococc    | g__Ruminiclostridium_9                     | s__unclassified_g__Ruminiclostridium_9                     |
| OTU31  | p__Firmicutes   | c__Clostridia   | o__Clostridiales  | f__Family_XIII   | g__[Eubacterium]_brachy_group              | s__uncultured_Eubacteriaceae_bacterium_g__[Eubacterium]_   |
| OTU549 | p__Bacteroidet  | c__Bacteroidia  | o__Bacteroidales  | f__Bacteroidale  | g__norank_f__Bacteroidales_S24-7_group     | s__uncultured_bacterium_g__norank_f__Bacteroidales_S24-7   |

|        |                |                 |                    |                   |                                            |                                                                    |
|--------|----------------|-----------------|--------------------|-------------------|--------------------------------------------|--------------------------------------------------------------------|
| OTU329 | p__Bacteroidet | c__Bacteroidia  | o__Bacteroidales   | f__Porphyromo     | g__Odoribacter                             | s__unclassified_g__Odoribacter                                     |
| OTU293 | p__Actinobacte | c__Actinobacte  | o__Coriobacteria   | f__Coriobacteri   | g__norank_f__Coriobacteriaceae             | s__uncultured_Coriobacteriales_bacterium                           |
| OTU369 | p__Firmicutes  | c__Clostridia   | o__Clostridiales   | f__Lachnospira    | g__Lachnospiraceae_NK4A136_group           | s__unclassified_g__Lachnospiraceae_NK4A136_group                   |
| OTU298 | p__Firmicutes  | c__Clostridia   | o__Clostridiales   | f__Lachnospira    | g__Lachnospiraceae_NK4A136_group           | s__unclassified_g__Lachnospiraceae_NK4A136_group                   |
| OTU436 | p__Firmicutes  | c__Clostridia   | o__Clostridiales   | f__Ruminococc     | g__Oscillibacter                           | s__uncultured_bacterium_g__Oscillibacter                           |
| OTU132 | p__Firmicutes  | c__Clostridia   | o__Clostridiales   | f__Lachnospira    | g__Roseburia                               | s__unclassified_g__Roseburia                                       |
| OTU434 | p__Firmicutes  | c__Clostridia   | o__Clostridiales   | f__Ruminococc     | g__Anaerotruncus                           | s__Anaerotruncus_colihominis_DSM_17241                             |
| OTU399 | p__Firmicutes  | c__Clostridia   | o__Clostridiales   | f__Family_XIII    | g__[Eubacterium]_brachy_group              | s__uncultured_bacterium_g__[Eubacterium]_brachy_group              |
| OTU95  | p__Firmicutes  | c__Clostridia   | o__Clostridiales   | f__Clostridiales  | g__norank_f__Clostridiales_vadinBB60_group | s__uncultured_bacterium_g__norank_f__Clostridiales_vadinBB60_group |
| OTU397 | p__Firmicutes  | c__Bacilli      | o__Lactobacillales | f__Lactobacilla   | g__Lactobacillus                           | s__unclassified_g__Lactobacillus                                   |
| OTU426 | p__Firmicutes  | c__Clostridia   | o__Clostridiales   | f__Peptococcac    | g__Peptococcus                             | s__uncultured_bacterium_g__Peptococcus                             |
| OTU165 | p__Tenericutes | c__Mollicutes   | o__Mollicutes_RF   | f__norank_o__l    | g__norank_o__Mollicutes_RF9                | s__unclassified_g__norank_o__Mollicutes_RF9                        |
| OTU716 | p__Firmicutes  | c__Clostridia   | o__Clostridiales   | f__Lachnospira    | g__Marvinbryantia                          | s__Clostridiales_bacterium_CIEAF_012                               |
| OTU217 | p__Firmicutes  | c__Clostridia   | o__Clostridiales   | f__Lachnospira    | g__Blautia                                 | s__Ruminococcus_sp._5_1_39BFAA                                     |
| OTU489 | p__Bacteroidet | c__Bacteroidia  | o__Bacteroidales   | f__Rikenellaceae  | g__Rikenella                               | s__unclassified_g__Rikenella                                       |
| OTU36  | p__Bacteroidet | c__Bacteroidia  | o__Bacteroidales   | f__Bacteroidale   | g__norank_f__Bacteroidales_S24-7_group     | s__uncultured_bacterium_g__norank_f__Bacteroidales_S24-7_group     |
| OTU127 | p__Firmicutes  | c__Clostridia   | o__Clostridiales   | f__Lachnospira    | g__Roseburia                               | s__unclassified_g__Roseburia                                       |
| OTU4   | p__Firmicutes  | c__Clostridia   | o__Clostridiales   | f__Ruminococc     | g__Ruminiclostridium_5                     | s__uncultured_Clostridiales_bacterium_g__Ruminiclostridium_5       |
| OTU129 | p__Firmicutes  | c__Clostridia   | o__Clostridiales   | f__Lachnospira    | g__Lachnospiraceae_UCG-001                 | s__unclassified_g__Lachnospiraceae_UCG-001                         |
| OTU303 | p__Bacteroidet | c__Bacteroidia  | o__Bacteroidales   | f__Prevotellaceae | g__Prevotellaceae_UCG-001                  | s__unclassified_g__Prevotellaceae_UCG-001                          |
| OTU49  | p__Bacteroidet | c__Bacteroidia  | o__Bacteroidales   | f__Bacteroidale   | g__norank_f__Bacteroidales_S24-7_group     | s__unclassified_g__norank_f__Bacteroidales_S24-7_group             |
| OTU351 | p__Firmicutes  | c__unclassified | o__unclassified    | f__unclassified   | g__unclassified_p__Firmicutes              | s__unclassified_p__Firmicutes                                      |
| OTU573 | p__Firmicutes  | c__Clostridia   | o__Clostridiales   | f__Lachnospira    | g__norank_f__Lachnospiraceae               | s__uncultured_bacterium_g__norank_f__Lachnospiraceae               |
| OTU358 | p__Bacteroidet | c__Bacteroidia  | o__Bacteroidales   | f__Bacteroidale   | g__norank_f__Bacteroidales_S24-7_group     | s__uncultured_bacterium_g__norank_f__Bacteroidales_S24-7_group     |
| OTU471 | p__Firmicutes  | c__Clostridia   | o__Clostridiales   | f__Lachnospira    | g__norank_f__Lachnospiraceae               | s__unclassified_g__norank_f__Lachnospiraceae                       |
| OTU333 | p__Firmicutes  | c__Clostridia   | o__Clostridiales   | f__Ruminococc     | g__unclassified_f__Ruminococcaceae         | s__unclassified_f__Ruminococcaceae                                 |
| OTU613 | p__Firmicutes  | c__Erysipelotri | o__Erysipelotricl  | f__Erysipelotric  | g__unclassified_f__Erysipelotrichaceae     | s__unclassified_f__Erysipelotrichaceae                             |
| OTU331 | p__Firmicutes  | c__Clostridia   | o__Clostridiales   | f__Lachnospira    | g__Lachnospiraceae_NK4A136_group           | s__uncultured_bacterium_g__Lachnospiraceae_NK4A136_group           |
| OTU558 | p__Bacteroidet | c__Bacteroidia  | o__Bacteroidales   | f__Bacteroidale   | g__norank_f__Bacteroidales_S24-7_group     | s__uncultured_bacterium_g__norank_f__Bacteroidales_S24-7_group     |
| OTU598 | p__Firmicutes  | c__Erysipelotri | o__Erysipelotricl  | f__Erysipelotric  | g__unclassified_f__Erysipelotrichaceae     | s__unclassified_f__Erysipelotrichaceae                             |
| OTU398 | p__Firmicutes  | c__Clostridia   | o__Clostridiales   | f__Lachnospira    | g__Lachnospiraceae_FCS020_group            | s__unclassified_g__Lachnospiraceae_FCS020_group                    |
| OTU28  | p__Firmicutes  | c__Clostridia   | o__Clostridiales   | f__Ruminococc     | g__Ruminiclostridium_6                     | s__unclassified_g__Ruminiclostridium_6                             |
| OTU446 | p__Firmicutes  | c__Clostridia   | o__Clostridiales   | f__Lachnospira    | g__Lachnospiraceae_NK4A136_group           | s__uncultured_bacterium_g__Lachnospiraceae_NK4A136_group           |
| OTU648 | p__Firmicutes  | c__Clostridia   | o__Clostridiales   | f__Peptococcac    | g__norank_f__Peptococcaceae                | s__unclassified_g__norank_f__Peptococcaceae                        |
| OTU29  | p__Firmicutes  | c__Clostridia   | o__Clostridiales   | f__Lachnospira    | g__Lachnospiraceae_NC2004_group            | s__unclassified_g__Lachnospiraceae_NC2004_group                    |
| OTU687 | p__Firmicutes  | c__Clostridia   | o__Clostridiales   | f__Lachnospira    | g__Marvinbryantia                          | s__uncultured_bacterium_g__Marvinbryantia                          |
| OTU717 | p__Firmicutes  | c__Clostridia   | o__Clostridiales   | f__Lachnospira    | g__Roseburia                               | s__uncultured_bacterium_g__Roseburia                               |
| OTU82  | p__Actinobacte | c__Actinobacte  | o__Coriobacteria   | f__Coriobacteri   | g__unclassified_f__Coriobacteriaceae       | s__unclassified_f__Coriobacteriaceae                               |
| OTU497 | p__Firmicutes  | c__Clostridia   | o__Clostridiales   | f__Lachnospira    | g__unclassified_f__Lachnospiraceae         | s__unclassified_f__Lachnospiraceae                                 |

|        |                |                 |                  |                  |                                            |                                                                              |
|--------|----------------|-----------------|------------------|------------------|--------------------------------------------|------------------------------------------------------------------------------|
| OTU355 | p__Bacteroidet | c__Bacteroidia  | o__Bacteroidales | f__Prevotellace  | g__Prevotellaceae_UCG-001                  | s__unclassified_g__Prevotellaceae_UCG-001                                    |
| OTU381 | p__Firmicutes  | c__Clostridia   | o__Clostridiales | f__Clostridiales | g__norank_f__Clostridiales_vadinBB60_group | s__uncultured_bacterium_g__norank_f__Clostridiales_vadinBB60_group           |
| OTU20  | p__Firmicutes  | c__Clostridia   | o__Clostridiales | f__Ruminococc    | g__Ruminococcaceae_UCG-014                 | s__uncultured_bacterium_g__Ruminococcaceae_UCG-014                           |
| OTU533 | p__Firmicutes  | c__Clostridia   | o__Clostridiales | f__Lachnospira   | g__Lachnospiraceae_NK4A136_group           | s__unclassified_g__Lachnospiraceae_NK4A136_group                             |
| OTU401 | p__Firmicutes  | c__unclassified | o__unclassified  | f__unclassified  | g__unclassified_p__Firmicutes              | s__unclassified_p__Firmicutes                                                |
| OTU634 | p__Proteobacte | c__Alphaproteo  | o__Sphingomonas  | f__Sphingomon    | g__Sphingomonas                            | s__Sphingomonas_paucimobilis_g__Sphingomonas                                 |
| OTU78  | p__Firmicutes  | c__Clostridia   | o__Clostridiales | f__Lachnospira   | g__Lachnospiraceae_NK4A136_group           | s__unclassified_g__Lachnospiraceae_NK4A136_group                             |
| OTU283 | p__Firmicutes  | c__Clostridia   | o__Clostridiales | f__Lachnospira   | g__norank_f__Lachnospiraceae               | s__Clostridium_sp._Culture-54                                                |
| OTU370 | p__Actinobacte | c__Actinobacte  | o__Coriobacteria | f__Coriobacteri  | g__Enterorhabdus                           | s__uncultured_bacterium_g__Enterorhabdus                                     |
| OTU377 | p__Firmicutes  | c__Clostridia   | o__Clostridiales | f__Ruminococc    | g__unclassified_f__Ruminococcaceae         | s__unclassified_f__Ruminococcaceae                                           |
| OTU284 | p__Proteobacte | c__Deltaproteo  | o__Desulfovibric | f__Desulfovibri  | g__Desulfovibrio                           | s__unclassified_g__Desulfovibrio                                             |
| OTU79  | p__Bacteroidet | c__Bacteroidia  | o__Bacteroidales | f__Bacteroidale  | g__norank_f__Bacteroidales_S24-7_group     | s__uncultured_bacterium_g__norank_f__Bacteroidales_S24-7_group               |
| OTU194 | p__Bacteroidet | c__Bacteroidia  | o__Bacteroidales | f__Bacteroidale  | g__norank_f__Bacteroidales_S24-7_group     | s__uncultured_Bacteroidales_bacterium_g__norank_f__Bacteroidales_S24-7_group |
| OTU538 | p__Firmicutes  | c__Clostridia   | o__Clostridiales | f__Lachnospira   | g__unclassified_f__Lachnospiraceae         | s__unclassified_f__Lachnospiraceae                                           |
| OTU203 | p__Bacteroidet | c__Bacteroidia  | o__Bacteroidales | f__Bacteroidale  | g__norank_f__Bacteroidales_S24-7_group     | s__uncultured_bacterium_g__norank_f__Bacteroidales_S24-7_group               |
| OTU57  | p__Bacteroidet | c__Bacteroidia  | o__Bacteroidales | f__Bacteroidale  | g__norank_f__Bacteroidales_S24-7_group     | s__uncultured_organism_g__norank_f__Bacteroidales_S24-7_group                |
| OTU578 | p__Firmicutes  | c__Clostridia   | o__Clostridiales | f__Christensene  | g__norank_f__Christensenellaceae           | s__uncultured_bacterium_g__norank_f__Christensenellaceae                     |
| OTU611 | p__Firmicutes  | c__Clostridia   | o__Clostridiales | f__Ruminococc    | g__Ruminococcaceae_UCG-005                 | s__uncultured_Clostridiales_bacterium_g__Ruminococcaceae                     |
| OTU500 | p__Bacteroidet | c__Bacteroidia  | o__Bacteroidales | f__Bacteroidace  | g__Bacteroides                             | s__unclassified_g__Bacteroides                                               |
| OTU605 | p__Firmicutes  | c__Clostridia   | o__Clostridiales | f__Lachnospira   | g__Lachnospiraceae_UCG-001                 | s__unclassified_g__Lachnospiraceae_UCG-001                                   |
| OTU220 | p__Bacteroidet | c__Bacteroidia  | o__Bacteroidales | f__Bacteroidale  | g__norank_f__Bacteroidales_S24-7_group     | s__uncultured_Bacteroidales_bacterium_g__norank_f__Bacteroidales_S24-7_group |
| OTU499 | p__Bacteroidet | c__Bacteroidia  | o__Bacteroidales | f__unclassified  | g__unclassified_o__Bacteroidales           | s__unclassified_o__Bacteroidales                                             |
| OTU474 | p__Firmicutes  | c__Clostridia   | o__Clostridiales | f__Lachnospira   | g__unclassified_f__Lachnospiraceae         | s__unclassified_f__Lachnospiraceae                                           |
| OTU309 | p__Bacteroidet | c__Bacteroidia  | o__Bacteroidales | f__Bacteroidale  | g__norank_f__Bacteroidales_S24-7_group     | s__unclassified_g__norank_f__Bacteroidales_S24-7_group                       |
| OTU459 | p__Firmicutes  | c__Clostridia   | o__Clostridiales | f__Ruminococc    | g__unclassified_f__Ruminococcaceae         | s__unclassified_f__Ruminococcaceae                                           |
| OTU526 | p__Bacteroidet | c__Bacteroidia  | o__Bacteroidales | f__Prevotellace  | g__Prevotellaceae_UCG-001                  | s__uncultured_Bacteroidales_bacterium_g__Prevotellaceae_UCG-001              |
| OTU403 | p__Firmicutes  | c__Clostridia   | o__Clostridiales | f__Ruminococc    | g__Butyricicoccus                          | s__unclassified_g__Butyricicoccus                                            |
| OTU175 | p__Bacteroidet | c__Bacteroidia  | o__Bacteroidales | f__Bacteroidale  | g__norank_f__Bacteroidales_S24-7_group     | s__unclassified_g__norank_f__Bacteroidales_S24-7_group                       |
| OTU625 | p__Firmicutes  | c__Erysipelotri | o__Erysipelotric | f__Erysipelotric | g__unclassified_f__Erysipelotrichaceae     | s__unclassified_f__Erysipelotrichaceae                                       |
| OTU612 | p__Firmicutes  | c__Clostridia   | o__Clostridiales | f__Clostridiales | g__norank_f__Clostridiales_vadinBB60_group | s__unclassified_g__norank_f__Clostridiales_vadinBB60_group                   |
| OTU156 | p__Firmicutes  | c__Bacilli      | o__Lactobacillak | f__Lactobacilla  | g__Lactobacillus                           | s__unclassified_g__Lactobacillus                                             |
| OTU159 | p__Firmicutes  | c__Bacilli      | o__Lactobacillak | f__Lactobacilla  | g__Lactobacillus                           | s__unclassified_g__Lactobacillus                                             |
| OTU26  | p__Firmicutes  | c__Clostridia   | o__Clostridiales | f__Lachnospira   | g__unclassified_f__Lachnospiraceae         | s__unclassified_f__Lachnospiraceae                                           |
| OTU308 | p__Proteobacte | c__Deltaproteo  | o__Desulfovibric | f__Desulfovibri  | g__Desulfovibrio                           | s__uncultured_bacterium_g__Desulfovibrio                                     |
| OTU691 | p__Bacteroidet | c__Bacteroidia  | o__Bacteroidales | f__Prevotellace  | g__unclassified_f__Prevotellaceae          | s__unclassified_f__Prevotellaceae                                            |
| OTU496 | p__Bacteroidet | c__Bacteroidia  | o__Bacteroidales | f__unclassified  | g__unclassified_o__Bacteroidales           | s__unclassified_o__Bacteroidales                                             |
| OTU475 | p__Firmicutes  | c__Clostridia   | o__Clostridiales | f__Clostridiace  | g__Clostridium_sensu_stricto_10            | s__uncultured_bacterium_g__Clostridium_sensu_stricto_10                      |
| OTU531 | p__Bacteroidet | c__Bacteroidia  | o__Bacteroidales | f__Porphyromo    | g__Odoribacter                             | s__uncultured_bacterium_g__Odoribacter                                       |
| OTU51  | p__Bacteroidet | c__Bacteroidia  | o__Bacteroidales | f__Bacteroidale  | g__norank_f__Bacteroidales_S24-7_group     | s__uncultured_bacterium_g__norank_f__Bacteroidales_S24-7_group               |

|        |                |                |                  |                                                  |                                            |                                                                         |
|--------|----------------|----------------|------------------|--------------------------------------------------|--------------------------------------------|-------------------------------------------------------------------------|
| OTU661 | p__Firmicutes  | c__Clostridia  | o__Clostridiales | f__Lachnospira                                   | g__Lachnoclostridium                       | s__unclassified_g__Lachnoclostridium                                    |
| OTU268 | p__Proteobacte | c__Alphaproteo | o__Rhodospirilla | f__Rhodospirill                                  | g__norank_f__Rhodospirillaceae             | s__gut_metagenome_g__norank_f__Rhodospirillaceae                        |
| OTU659 | p__Firmicutes  | c__Clostridia  | o__Clostridiales | f__Lachnospira                                   | g__unclassified_f__Lachnospiraceae         | s__unclassified_f__Lachnospiraceae                                      |
| OTU255 | p__Firmicutes  | c__Clostridia  | o__Clostridiales | f__Clostridiales                                 | g__norank_f__Clostridiales_vadinBB60_group | s__uncultured_bacterium_g__norank_f__Clostridiales_vadinBB60_group      |
| OTU204 | p__Bacteroidet | c__Bacteroidia | o__Bacteroidales | f__Bacteroidale                                  | g__norank_f__Bacteroidales_S24-7_group     | s__unclassified_g__norank_f__Bacteroidales_S24-7_group                  |
| OTU12  | p__Bacteroidet | c__Bacteroidia | o__Bacteroidales | f__Bacteroidale                                  | g__norank_f__Bacteroidales_S24-7_group     | s__uncultured_bacterium_g__norank_f__Bacteroidales_S24-7_group          |
| OTU669 | p__Bacteroidet | c__Bacteroidia | o__Bacteroidales | f__Bacteroidale                                  | g__norank_f__Bacteroidales_S24-7_group     | s__uncultured_bacterium_g__norank_f__Bacteroidales_S24-7_group          |
| OTU679 | p__Firmicutes  | c__Clostridia  | o__Clostridiales | f__Lachnospira                                   | g__Coprococcus_1                           | s__uncultured_bacterium_g__Coprococcus_1                                |
| OTU360 | p__Firmicutes  | c__Clostridia  | o__Clostridiales | f__Lachnospira                                   | g__Roseburia                               | s__uncultured_bacterium_g__Roseburia                                    |
| OTU256 | p__Firmicutes  | c__Clostridia  | o__Clostridiales | f__Clostridiales                                 | g__norank_f__Clostridiales_vadinBB60_group | s__uncultured_bacterium_g__norank_f__Clostridiales_vadinBB60_group      |
| OTU328 | p__Bacteroidet | c__Bacteroidia | o__Bacteroidales | f__Bacteroidale                                  | g__norank_f__Bacteroidales_S24-7_group     | s__unclassified_g__norank_f__Bacteroidales_S24-7_group                  |
| OTU180 | p__Firmicutes  | c__Clostridia  | o__Clostridiales | f__Ruminococc                                    | g__Ruminococcaceae_UCG-014                 | s__unclassified_g__Ruminococcaceae_UCG-014                              |
| OTU657 | p__Firmicutes  | c__Clostridia  | o__Clostridiales | f__Lachnospira                                   | g__norank_f__Lachnospiraceae               | s__unclassified_g__norank_f__Lachnospiraceae                            |
| OTU260 | p__Bacteroidet | c__Bacteroidia | o__Bacteroidales | f__unclassified_g__unclassified_o__Bacteroidales |                                            | s__unclassified_o__Bacteroidales                                        |
| OTU209 | p__Bacteroidet | c__Bacteroidia | o__Bacteroidales | f__Bacteroidale                                  | g__norank_f__Bacteroidales_S24-7_group     | s__uncultured_bacterium_g__norank_f__Bacteroidales_S24-7_group          |
| OTU249 | p__Bacteroidet | c__Flavobacter | o__Flavobacteria | f__Flavobacteri                                  | g__norank_f__Flavobacteriaceae             | s__gut_metagenome_g__norank_f__Flavobacteriaceae                        |
| OTU371 | p__Firmicutes  | c__Clostridia  | o__Clostridiales | f__Lachnospira                                   | g__unclassified_f__Lachnospiraceae         | s__unclassified_f__Lachnospiraceae                                      |
| OTU363 | p__Firmicutes  | c__Clostridia  | o__Clostridiales | f__Ruminococc                                    | g__Anaerotruncus                           | s__unclassified_g__Anaerotruncus                                        |
| OTU96  | p__Firmicutes  | c__Clostridia  | o__Clostridiales | f__Ruminococc                                    | g__Anaerotruncus                           | s__uncultured_bacterium_g__Anaerotruncus                                |
| OTU415 | p__Firmicutes  | c__Clostridia  | o__Clostridiales | f__Lachnospira                                   | g__Blautia                                 | s__unclassified_g__Blautia                                              |
| OTU407 | p__Firmicutes  | c__Clostridia  | o__Clostridiales | f__Lachnospira                                   | g__unclassified_f__Lachnospiraceae         | s__unclassified_f__Lachnospiraceae                                      |
| OTU449 | p__Firmicutes  | c__Clostridia  | o__Clostridiales | f__Ruminococc                                    | g__Ruminiclostridium                       | s__uncultured_bacterium_g__Ruminiclostridium                            |
| OTU322 | p__Bacteroidet | c__Bacteroidia | o__Bacteroidales | f__Porphyromo                                    | g__Parabacteroides                         | s__unclassified_g__Parabacteroides                                      |
| OTU516 | p__Bacteroidet | c__Bacteroidia | o__Bacteroidales | f__Porphyromo                                    | g__Butyricimonas                           | s__Butyricimonas_virosa                                                 |
| OTU402 | p__Firmicutes  | c__Clostridia  | o__Clostridiales | f__Lachnospira                                   | g__norank_f__Lachnospiraceae               | s__unclassified_g__norank_f__Lachnospiraceae                            |
| OTU681 | p__Actinobacte | c__Actinobacte | o__Coriobacteria | f__Coriobacteri                                  | g__Gordonibacter                           | s__uncultured_bacterium_g__Gordonibacter                                |
| OTU507 | p__Firmicutes  | c__Clostridia  | o__Clostridiales | f__Family_XIII                                   | g__Family_XIII_UCG-001                     | s__uncultured_bacterium_g__Family_XIII_UCG-001                          |
| OTU639 | p__Firmicutes  | c__Clostridia  | o__Clostridiales | f__Lachnospira                                   | g__norank_f__Lachnospiraceae               | s__unclassified_g__norank_f__Lachnospiraceae                            |
| OTU610 | p__Firmicutes  | c__Clostridia  | o__Clostridiales | f__Clostridiales                                 | g__norank_f__Clostridiales_vadinBB60_group | s__unclassified_g__norank_f__Clostridiales_vadinBB60_group              |
| OTU448 | p__Firmicutes  | c__Clostridia  | o__Clostridiales | f__Lachnospira                                   | g__norank_f__Lachnospiraceae               | s__unclassified_g__norank_f__Lachnospiraceae                            |
| OTU600 | p__Firmicutes  | c__Clostridia  | o__Clostridiales | f__Ruminococc                                    | g__Anaerotruncus                           | s__unclassified_g__Anaerotruncus                                        |
| OTU581 | p__Firmicutes  | c__Clostridia  | o__Clostridiales | f__Ruminococc                                    | g__Ruminiclostridium_9                     | s__unclassified_g__Ruminiclostridium_9                                  |
| OTU324 | p__Bacteroidet | c__Bacteroidia | o__Bacteroidales | f__Porphyromo                                    | g__Parabacteroides                         | s__Parabacteroides_goldsteinii                                          |
| OTU636 | p__Bacteroidet | c__Bacteroidia | o__Bacteroidales | f__Prevotellace                                  | g__Paraprevotella                          | s__unclassified_g__Paraprevotella                                       |
| OTU495 | p__Firmicutes  | c__Clostridia  | o__Clostridiales | f__Lachnospira                                   | g__unclassified_f__Lachnospiraceae         | s__unclassified_f__Lachnospiraceae                                      |
| OTU487 | p__Bacteroidet | c__Bacteroidia | o__Bacteroidales | f__Bacteroidale                                  | g__norank_f__Bacteroidales_S24-7_group     | s__uncultured_bacterium_g__norank_f__Bacteroidales_S24-7_group          |
| OTU259 | p__Tenericutes | c__Mollicutes  | o__Mollicutes_R  | f__norank_o__!g__norank_o__Mollicutes_RF9        |                                            | s__uncultured_Erysipelotrichaceae_bacterium_g__norank_o__Mollicutes_RF9 |
| OTU378 | p__Firmicutes  | c__Clostridia  | o__Clostridiales | f__Lachnospira                                   | g__Tyzzerella                              | s__uncultured_bacterium_g__Tyzzerella                                   |
| OTU527 | p__Bacteroidet | c__Bacteroidia | o__Bacteroidales | f__Bacteroidac                                   | g__Bacteroides                             | s__unclassified_g__Bacteroides                                          |

|        |                |                 |                   |                  |                         |                              |                                                                |               |
|--------|----------------|-----------------|-------------------|------------------|-------------------------|------------------------------|----------------------------------------------------------------|---------------|
| OTU39  | p__Firmicutes  | c__Clostridia   | o__Clostridiales  | f__Ruminococc    | g__Ruminococcaceae      | UCG-014                      | s__unclassified_g__Ruminococcaceae                             | UCG-014       |
| OTU323 | p__Bacteroidet | c__Bacteroidia  | o__Bacteroidales  | f__Rikenellaceae | g__Alistipes            |                              | s__uncultured_bacterium_g__Alistipes                           |               |
| OTU252 | p__Bacteroidet | c__Bacteroidia  | o__Bacteroidales  | f__unclassified  | g__unclassified         | o__Bacteroidales             | s__unclassified_o__Bacteroidales                               |               |
| OTU410 | p__Firmicutes  | c__Clostridia   | o__Clostridiales  | f__Ruminococc    | g__Faecalibacterium     |                              | s__unclassified_g__Faecalibacterium                            |               |
| OTU532 | p__Bacteroidet | c__Bacteroidia  | o__Bacteroidales  | f__Bacteroidale  | g__norank               | f__Bacteroidales_S24-7_group | s__unclassified_g__norank_f__Bacteroidales_S24-7_group         |               |
| OTU680 | p__Firmicutes  | c__Clostridia   | o__Clostridiales  | f__Lachnospira   | g__Coproccoccus_1       |                              | s__unclassified_g__Coproccoccus_1                              |               |
| OTU166 | p__Actinobacte | c__Actinobacte  | o__Coriobacteria  | f__Coriobacteri  | g__Enterorhabdus        |                              | s__uncultured_bacterium_g__Enterorhabdus                       |               |
| OTU694 | p__Firmicutes  | c__Clostridia   | o__Clostridiales  | f__Lachnospira   | g__unclassified         | f__Lachnospiraceae           | s__unclassified_f__Lachnospiraceae                             |               |
| OTU317 | p__Bacteroidet | c__Bacteroidia  | o__Bacteroidales  | f__Bacteroidale  | g__norank               | f__Bacteroidales_S24-7_group | s__unclassified_g__norank_f__Bacteroidales_S24-7_group         |               |
| OTU506 | p__Firmicutes  | c__Clostridia   | o__Clostridiales  | f__Ruminococc    | g__Ruminiclostridium_9  |                              | s__uncultured_bacterium_g__Ruminiclostridium_9                 |               |
| OTU113 | p__Bacteroidet | c__Bacteroidia  | o__Bacteroidales  | f__Bacteroidale  | g__norank               | f__Bacteroidales_S24-7_group | s__uncultured_bacterium_g__norank_f__Bacteroidales_S24-7_group |               |
| OTU174 | p__Firmicutes  | c__Clostridia   | o__Clostridiales  | f__Lachnospira   | g__Lachnospiraceae      | UCG-001                      | s__unclassified_g__Lachnospiraceae                             | UCG-001       |
| OTU432 | p__Firmicutes  | c__Clostridia   | o__Clostridiales  | f__Lachnospira   | g__unclassified         | f__Lachnospiraceae           | s__unclassified_f__Lachnospiraceae                             |               |
| OTU592 | p__Firmicutes  | c__Clostridia   | o__Clostridiales  | f__Lachnospira   | g__Lachnospiraceae      | NK4A136_group                | s__uncultured_bacterium_g__Lachnospiraceae                     | NK4A136_gr    |
| OTU440 | p__Actinobacte | c__Actinobacte  | o__Propionibacte  | f__Propionibact  | g__Propionibacterium    |                              | s__Propionibacterium_acnes_subsp._acnes_g__Propionibacte       |               |
| OTU523 | p__Firmicutes  | c__Bacilli      | o__Lactobacillak  | f__Streptococc   | g__Streptococcus        |                              | s__Streptococcus_hyointestinalis                               |               |
| OTU214 | p__Actinobacte | c__Actinobacte  | o__Coriobacteria  | f__Coriobacteri  | g__Enterorhabdus        |                              | s__uncultured_bacterium_g__Enterorhabdus                       |               |
| OTU651 | p__Bacteroidet | c__Bacteroidia  | o__Bacteroidales  | f__Bacteroidale  | g__norank               | f__Bacteroidales_S24-7_group | s__uncultured_bacterium_g__norank_f__Bacteroidales_S24-7_group |               |
| OTU201 | p__Actinobacte | c__Actinobacte  | o__Coriobacteria  | f__Coriobacteri  | g__Parvibacter          |                              | s__uncultured_bacterium_g__Parvibacter                         |               |
| OTU631 | p__Firmicutes  | c__Erysipelotri | o__Erysipelotricl | f__Erysipelotric | g__norank               | f__Erysipelotrichaceae       | s__unclassified_g__norank_f__Erysipelotrichaceae               |               |
| OTU560 | p__Firmicutes  | c__Clostridia   | o__Clostridiales  | f__Lachnospira   | g__unclassified         | f__Lachnospiraceae           | s__unclassified_f__Lachnospiraceae                             |               |
| OTU571 | p__Firmicutes  | c__Clostridia   | o__Clostridiales  | f__Lachnospira   | g__unclassified         | f__Lachnospiraceae           | s__unclassified_f__Lachnospiraceae                             |               |
| OTU684 | p__Cyanobacte  | c__Cyanobacte   | o__Gastranaerop   | f__norank        | o__(g__norank           | o__Gastranaerophilales       | s__uncultured_bacterium_g__norank_o__Gastranaerophilales       |               |
| OTU490 | p__Bacteroidet | c__Bacteroidia  | o__Bacteroidales  | f__Bacteroidale  | g__norank               | f__Bacteroidales_S24-7_group | s__unclassified_g__norank_f__Bacteroidales_S24-7_group         |               |
| OTU618 | p__Firmicutes  | c__Clostridia   | o__Clostridiales  | f__Ruminococc    | g__Anaerotruncus        |                              | s__uncultured_bacterium_g__Anaerotruncus                       |               |
| OTU247 | p__Firmicutes  | c__Clostridia   | o__Clostridiales  | f__Lachnospira   | g__Lachnospiraceae      | NK4A136_group                | s__uncultured_bacterium_g__Lachnospiraceae                     | NK4A136_gr    |
| OTU675 | p__Firmicutes  | c__Clostridia   | o__Clostridiales  | f__Lachnospira   | g__norank               | f__Lachnospiraceae           | s__mouse_gut_metagenome_g__norank                              |               |
| OTU295 | p__Bacteroidet | c__Bacteroidia  | o__Bacteroidales  | f__Bacteroidale  | g__norank               | f__Bacteroidales_S24-7_group | s__unclassified_g__norank_f__Bacteroidales_S24-7_group         |               |
| OTU108 | p__Firmicutes  | c__Clostridia   | o__Clostridiales  | f__Ruminococc    | g__Ruminococcaceae      | UCG-013                      | s__uncultured_organism_g__Ruminococcaceae                      | UCG-013       |
| OTU594 | p__Firmicutes  | c__Clostridia   | o__Clostridiales  | f__Ruminococc    | g__unclassified         | f__Ruminococcaceae           | s__unclassified_f__Ruminococcaceae                             |               |
| OTU697 | p__Firmicutes  | c__Clostridia   | o__Clostridiales  | f__Lachnospira   | g__norank               | f__Lachnospiraceae           | s__unclassified_g__norank_f__Lachnospiraceae                   |               |
| OTU267 | p__Proteobacte | c__Alphaproteo  | o__Rhodospirilla  | f__Rhodospirill  | g__norank               | f__Rhodospirillaceae         | s__gut_metagenome_g__norank_f__Rhodospirillaceae               |               |
| OTU68  | p__Firmicutes  | c__Clostridia   | o__Clostridiales  | f__Lachnospira   | g__Lachnospiraceae      | NK4A136_group                | s__unclassified_g__Lachnospiraceae                             | NK4A136_group |
| OTU445 | p__Deferribact | c__Deferribact  | o__Deferribacter  | f__Deferribacte  | g__Mucispirillum        |                              | s__uncultured_bacterium_g__Mucispirillum                       |               |
| OTU167 | p__Bacteroidet | c__Bacteroidia  | o__Bacteroidales  | f__Bacteroidale  | g__norank               | f__Bacteroidales_S24-7_group | s__uncultured_bacterium_g__norank_f__Bacteroidales_S24-7_group |               |
| OTU393 | p__Firmicutes  | c__Clostridia   | o__Clostridiales  | f__Ruminococc    | g__Ruminococcaceae      | UCG-014                      | s__unclassified_g__Ruminococcaceae                             | UCG-014       |
| OTU235 | p__Firmicutes  | c__Clostridia   | o__Clostridiales  | f__Family_XIII   | g__Anaerovorax          |                              | s__uncultured_bacterium_g__Anaerovorax                         |               |
| OTU454 | p__Firmicutes  | c__Clostridia   | o__Clostridiales  | f__Lachnospira   | g__Lachnospiraceae      | NK4A136_group                | s__unclassified_g__Lachnospiraceae                             | NK4A136_group |
| OTU101 | p__Proteobacte | c__Gammaprot    | o__Enterobacteri  | f__Enterobacter  | g__Escherichia-Shigella |                              | s__unclassified_g__Escherichia-Shigella                        |               |

|        |                   |                       |                            |                             |                                            |                                                                    |
|--------|-------------------|-----------------------|----------------------------|-----------------------------|--------------------------------------------|--------------------------------------------------------------------|
| OTU372 | p__Bacteroidetes  | c__Bacteroidia        | o__Bacteroidales           | f__Bacteroidales            | g__norank_f__Bacteroidales_S24-7_group     | s__uncultured_bacterium_g__norank_f__Bacteroidales_S24-7           |
| OTU3   | p__Firmicutes     | c__Clostridia         | o__Clostridiales           | f__Lachnospirae             | g__unclassified_f__Lachnospiraceae         | s__unclassified_f__Lachnospiraceae                                 |
| OTU169 | p__Actinobacteria | c__Actinobacteria     | o__Coriobacteriales        | f__Coriobacteriales         | g__Enterorhabdus                           | s__uncultured_bacterium_g__Enterorhabdus                           |
| OTU130 | p__Firmicutes     | c__Clostridia         | o__Clostridiales           | f__Ruminococcales           | g__Ruminiclostridium_5                     | s__uncultured_bacterium_g__Ruminiclostridium_5                     |
| OTU469 | p__Firmicutes     | c__Clostridia         | o__Clostridiales           | f__Ruminococcales           | g__unclassified_f__Ruminococcaceae         | s__unclassified_f__Ruminococcaceae                                 |
| OTU404 | p__Firmicutes     | c__Clostridia         | o__Clostridiales           | f__Clostridiales            | g__norank_f__Clostridiales_vadinBB60_group | s__uncultured_bacterium_g__norank_f__Clostridiales_vadinBB60_group |
| OTU81  | p__Firmicutes     | c__Clostridia         | o__Clostridiales           | f__Lachnospirae             | g__unclassified_f__Lachnospiraceae         | s__unclassified_f__Lachnospiraceae                                 |
| OTU65  | p__Firmicutes     | c__Clostridia         | o__Clostridiales           | f__Ruminococcales           | g__unclassified_f__Ruminococcaceae         | s__unclassified_f__Ruminococcaceae                                 |
| OTU44  | p__Firmicutes     | c__Clostridia         | o__Clostridiales           | f__Ruminococcales           | g__unclassified_f__Ruminococcaceae         | s__unclassified_f__Ruminococcaceae                                 |
| OTU195 | p__Bacteroidetes  | c__Bacteroidia        | o__Bacteroidales           | f__Bacteroidales            | g__norank_f__Bacteroidales_S24-7_group     | s__uncultured_bacterium_g__norank_f__Bacteroidales_S24-7           |
| OTU365 | p__Firmicutes     | c__Clostridia         | o__Clostridiales           | f__Lachnospirae             | g__[Eubacterium]_fissicatena_group         | s__unclassified_g__[Eubacterium]_fissicatena_group                 |
| OTU326 | p__Bacteroidetes  | c__Bacteroidia        | o__Bacteroidales           | f__Porphyromonadales        | g__Parabacteroides                         | s__unclassified_g__Parabacteroides                                 |
| OTU258 | p__Firmicutes     | c__Clostridia         | o__Clostridiales           | f__Ruminococcales           | g__Anaerotruncus                           | s__Anaerotruncus_sp._G3_2012_                                      |
| OTU359 | p__Bacteroidetes  | c__Bacteroidia        | o__Bacteroidales           | f__Bacteroidales            | g__norank_f__Bacteroidales_S24-7_group     | s__uncultured_bacterium_g__norank_f__Bacteroidales_S24-7           |
| OTU240 | p__Firmicutes     | c__Clostridia         | o__Clostridiales           | f__Clostridiales            | g__norank_f__Clostridiales_vadinBB60_group | s__uncultured_bacterium_g__norank_f__Clostridiales_vadinBB60_group |
| OTU234 | p__Tenericutes    | c__Mollicutes         | o__Mollicutes              | f__norank_o__Mollicutes_RF9 | g__norank_o__Mollicutes_RF9                | s__uncultured_bacterium_g__norank_o__Mollicutes_RF9                |
| OTU542 | p__Firmicutes     | c__Erysipelotrichi    | o__Erysipelotrichi         | f__Erysipelotrichi          | g__unclassified_f__Erysipelotrichaceae     | s__unclassified_f__Erysipelotrichaceae                             |
| OTU83  | p__Firmicutes     | c__Clostridia         | o__Clostridiales           | f__Ruminococcales           | g__Ruminococcaceae_UCG-014                 | s__unclassified_g__Ruminococcaceae_UCG-014                         |
| OTU642 | p__Firmicutes     | c__Clostridia         | o__Clostridiales           | f__Lachnospirae             | g__unclassified_f__Lachnospiraceae         | s__unclassified_f__Lachnospiraceae                                 |
| OTU70  | p__Firmicutes     | c__Clostridia         | o__Clostridiales           | f__Ruminococcales           | g__Ruminococcaceae_UCG-005                 | s__uncultured_Clostridiales_bacterium_g__Ruminococcaceae           |
| OTU491 | p__Bacteroidetes  | c__Bacteroidia        | o__Bacteroidales           | f__Prevotellaceae           | g__unclassified_f__Prevotellaceae          | s__unclassified_f__Prevotellaceae                                  |
| OTU708 | p__Firmicutes     | c__Clostridia         | o__Clostridiales           | f__Lachnospirae             | g__Lachnospiraceae_UCG-001                 | s__uncultured_Clostridiales_bacterium_g__Lachnospiraceae           |
| OTU269 | p__Firmicutes     | c__Clostridia         | o__Clostridiales           | f__Lachnospirae             | g__Lachnoclostridium                       | s__unclassified_g__Lachnoclostridium                               |
| OTU461 | p__Firmicutes     | c__Clostridia         | o__Clostridiales           | f__Lachnospirae             | g__norank_f__Lachnospiraceae               | s__unclassified_g__norank_f__Lachnospiraceae                       |
| OTU150 | p__Actinobacteria | c__Actinobacteria     | o__Bifidobacteriales       | f__Bifidobacteriales        | g__Bifidobacterium                         | s__Bifidobacterium_pseudolongum_PV8-2                              |
| OTU299 | p__Cyanobacteria  | c__Cyanobacteria      | o__norank_c__Cyanobacteria | f__norank_c__Cyanobacteria  | g__norank_c__Cyanobacteria                 | s__unclassified_g__norank_c__Cyanobacteria                         |
| OTU264 | p__Firmicutes     | c__Clostridia         | o__Clostridiales           | f__Lachnospirae             | g__Coprococcus_1                           | s__uncultured_bacterium_g__Coprococcus_1                           |
| OTU574 | p__Bacteroidetes  | c__Bacteroidia        | o__Bacteroidales           | f__Bacteroidales            | g__norank_f__Bacteroidales_S24-7_group     | s__uncultured_bacterium_g__norank_f__Bacteroidales_S24-7           |
| OTU616 | p__Firmicutes     | c__Clostridia         | o__Clostridiales           | f__Lachnospirae             | g__norank_f__Lachnospiraceae               | s__uncultured_bacterium_g__norank_f__Lachnospiraceae               |
| OTU577 | p__Bacteroidetes  | c__Bacteroidia        | o__Bacteroidales           | f__Prevotellaceae           | g__Prevotellaceae_UCG-003                  | s__unclassified_g__Prevotellaceae_UCG-003                          |
| OTU84  | p__Bacteroidetes  | c__Bacteroidia        | o__Bacteroidales           | f__Bacteroidales            | g__norank_f__Bacteroidales_S24-7_group     | s__uncultured_bacterium_g__norank_f__Bacteroidales_S24-7           |
| OTU74  | p__Tenericutes    | c__Mollicutes         | o__Mollicutes              | f__norank_o__Mollicutes_RF9 | g__norank_o__Mollicutes_RF9                | s__unclassified_g__norank_o__Mollicutes_RF9                        |
| OTU69  | p__Firmicutes     | c__Clostridia         | o__Clostridiales           | f__Ruminococcales           | g__Ruminococcaceae_NK4A214_group           | s__uncultured_bacterium_g__Ruminococcaceae_NK4A214_group           |
| OTU485 | p__Proteobacteria | c__Betaproteobacteria | o__Burkholderiales         | f__Alcaligenales            | g__Parasutterella                          | s__uncultured_bacterium_g__Parasutterella                          |
| OTU207 | p__Bacteroidetes  | c__Bacteroidia        | o__Bacteroidales           | f__Bacteroidales            | g__norank_f__Bacteroidales_S24-7_group     | s__uncultured_bacterium_g__norank_f__Bacteroidales_S24-7           |
| OTU47  | p__Bacteroidetes  | c__Bacteroidia        | o__Bacteroidales           | f__Bacteroidales            | g__norank_f__Bacteroidales_S24-7_group     | s__uncultured_bacterium_g__norank_f__Bacteroidales_S24-7           |
| OTU145 | p__Bacteroidetes  | c__Bacteroidia        | o__Bacteroidales           | f__Bacteroidales            | g__norank_f__Bacteroidales_S24-7_group     | s__uncultured_bacterium_g__norank_f__Bacteroidales_S24-7           |
| OTU243 | p__Bacteroidetes  | c__Bacteroidia        | o__Bacteroidales           | f__Bacteroidales            | g__norank_f__Bacteroidales_S24-7_group     | s__uncultured_bacterium_g__norank_f__Bacteroidales_S24-7           |
| OTU477 | p__Firmicutes     | c__Clostridia         | o__Clostridiales           | f__Lachnospirae             | g__unclassified_f__Lachnospiraceae         | s__unclassified_f__Lachnospiraceae                                 |

|        |                   |                          |                       |                                                |                                            |                                                                              |
|--------|-------------------|--------------------------|-----------------------|------------------------------------------------|--------------------------------------------|------------------------------------------------------------------------------|
| OTU148 | p__Firmicutes     | c__Bacilli               | o__Lactobacillales    | f__Enterococcales                              | g__Enterococcus                            | s__unclassified_g__Enterococcus                                              |
| OTU320 | p__Bacteroidetes  | c__Bacteroidia           | o__Bacteroidales      | f__Bacteroidales                               | g__Bacteroides                             | s__Bacteroides_acidifaciens                                                  |
| OTU301 | p__Firmicutes     | c__Clostridia            | o__Clostridiales      | f__Lachnospirales                              | g__Roseburia                               | s__uncultured_bacterium_g__Roseburia                                         |
| OTU635 | p__Firmicutes     | c__Clostridia            | o__Clostridiales      | f__Lachnospirales                              | g__unclassified_f__Lachnospiraceae         | s__unclassified_f__Lachnospiraceae                                           |
| OTU147 | p__Cyanobacteria  | c__Cyanobacteria         | o__Gastranaerophiles  | f__norank_o__(g__norank_o__Gastranaerophilales |                                            | s__uncultured_rumen_bacterium_g__norank_o__Gastranaerophilales               |
| OTU678 | p__Proteobacteria | c__Epsilonproteobacteria | o__Campylobacteriales | f__Helicobacteriales                           | g__Helicobacter                            | s__Helicobacter_mastomyrinus                                                 |
| OTU15  | p__Bacteroidetes  | c__Bacteroidia           | o__Bacteroidales      | f__Bacteroidales                               | g__norank_f__Bacteroidales_S24-7_group     | s__unclassified_g__norank_f__Bacteroidales_S24-7_group                       |
| OTU278 | p__Proteobacteria | c__Deltaproteobacteria   | o__Desulfovibrionales | f__Desulfovibrionales                          | g__Desulfovibrio                           | s__uncultured_bacterium_g__Desulfovibrio                                     |
| OTU514 | p__Bacteroidetes  | c__Bacteroidia           | o__Bacteroidales      | f__Rikenellaceae                               | g__Rikenellaceae_RC9_gut_group             | s__uncultured_bacterium_g__Rikenellaceae_RC9_gut_group                       |
| OTU408 | p__Firmicutes     | c__Clostridia            | o__Clostridiales      | f__Lachnospirales                              | g__norank_f__Lachnospiraceae               | s__uncultured_bacterium_g__norank_f__Lachnospiraceae                         |
| OTU60  | p__Firmicutes     | c__Clostridia            | o__Clostridiales      | f__Lachnospirales                              | g__unclassified_f__Lachnospiraceae         | s__unclassified_f__Lachnospiraceae                                           |
| OTU346 | p__Firmicutes     | c__Clostridia            | o__Clostridiales      | f__Lachnospirales                              | g__Lachnospiraceae_UCG-006                 | s__uncultured_bacterium_g__Lachnospiraceae_UCG-006                           |
| OTU494 | p__Firmicutes     | c__Clostridia            | o__Clostridiales      | f__Ruminococcales                              | g__unclassified_f__Ruminococcaceae         | s__unclassified_f__Ruminococcaceae                                           |
| OTU262 | p__Bacteroidetes  | c__Bacteroidia           | o__Bacteroidales      | f__Bacteroidales                               | g__Bacteroides                             | s__unclassified_g__Bacteroides                                               |
| OTU321 | p__Bacteroidetes  | c__Bacteroidia           | o__Bacteroidales      | f__Rikenellaceae                               | g__Alistipes                               | s__gut_metagenome_g__Alistipes                                               |
| OTU335 | p__Firmicutes     | c__Clostridia            | o__Clostridiales      | f__Clostridiales                               | g__norank_f__Clostridiales_vadinBB60_group | s__unclassified_g__norank_f__Clostridiales_vadinBB60_group                   |
| OTU227 | p__Firmicutes     | c__Clostridia            | o__Clostridiales      | f__Lachnospirales                              | g__norank_f__Lachnospiraceae               | s__Clostridium_sp._Clone-47                                                  |
| OTU395 | p__Firmicutes     | c__Erysipelotrichi       | o__Erysipelotrichi    | f__Erysipelotrichi                             | g__Faecalibaculum                          | s__uncultured_bacterium_g__Faecalibaculum                                    |
| OTU35  | p__Proteobacteria | c__Betaproteobacteria    | o__Burkholderiales    | f__Alcaligenales                               | g__Parasutterella                          | s__uncultured_organism_g__Parasutterella                                     |
| OTU567 | p__Firmicutes     | c__Clostridia            | o__Clostridiales      | f__Lachnospirales                              | g__norank_f__Lachnospiraceae               | s__unclassified_g__norank_f__Lachnospiraceae                                 |
| OTU665 | p__Firmicutes     | c__Clostridia            | o__Clostridiales      | f__Ruminococcales                              | g__unclassified_f__Ruminococcaceae         | s__unclassified_f__Ruminococcaceae                                           |
| OTU693 | p__Firmicutes     | c__Clostridia            | o__Clostridiales      | f__Lachnospirales                              | g__norank_f__Lachnospiraceae               | s__unclassified_g__norank_f__Lachnospiraceae                                 |
| OTU228 | p__Firmicutes     | c__Clostridia            | o__Clostridiales      | f__Lachnospirales                              | g__unclassified_f__Lachnospiraceae         | s__unclassified_f__Lachnospiraceae                                           |
| OTU387 | p__Proteobacteria | c__Deltaproteobacteria   | o__Desulfovibrionales | f__Desulfovibrionales                          | g__Desulfovibrio                           | s__unclassified_g__Desulfovibrio                                             |
| OTU535 | p__Bacteroidetes  | c__Bacteroidia           | o__Bacteroidales      | f__Rikenellaceae                               | g__Rikenella                               | s__Rikenella_microfusum_DSM_15922                                            |
| OTU530 | p__Bacteroidetes  | c__Bacteroidia           | o__Bacteroidales      | f__Bacteroidales                               | g__norank_f__Bacteroidales_S24-7_group     | s__uncultured_Bacteroidales_bacterium_g__norank_f__Bacteroidales_S24-7_group |
| OTU211 | p__Bacteroidetes  | c__Bacteroidia           | o__Bacteroidales      | f__Porphyromonadales                           | g__Parabacteroides                         | s__Parabacteroides_merdae                                                    |
| OTU11  | p__Bacteroidetes  | c__Bacteroidia           | o__Bacteroidales      | f__Bacteroidales                               | g__norank_f__Bacteroidales_S24-7_group     | s__uncultured_bacterium_g__norank_f__Bacteroidales_S24-7_group               |
| OTU14  | p__Bacteroidetes  | c__Bacteroidia           | o__Bacteroidales      | f__Bacteroidales                               | g__norank_f__Bacteroidales_S24-7_group     | s__uncultured_bacterium_g__norank_f__Bacteroidales_S24-7_group               |
| OTU374 | p__Firmicutes     | c__Erysipelotrichi       | o__Erysipelotrichi    | f__Erysipelotrichi                             | g__Faecalitalea                            | s__[Eubacterium]_dolichum                                                    |
| OTU509 | p__Bacteroidetes  | c__Bacteroidia           | o__Bacteroidales      | f__Bacteroidales                               | g__norank_f__Bacteroidales_S24-7_group     | s__uncultured_bacterium_g__norank_f__Bacteroidales_S24-7_group               |
| OTU464 | p__Bacteroidetes  | c__Bacteroidia           | o__Bacteroidales      | f__Bacteroidales                               | g__norank_f__Bacteroidales_S24-7_group     | s__uncultured_bacterium_g__norank_f__Bacteroidales_S24-7_group               |
| OTU501 | p__Firmicutes     | c__Clostridia            | o__Clostridiales      | f__Ruminococcales                              | g__Anaerotruncus                           | s__unclassified_g__Anaerotruncus                                             |
| OTU89  | p__Firmicutes     | c__Erysipelotrichi       | o__Erysipelotrichi    | f__Erysipelotrichi                             | g__Allobaculum                             | s__uncultured_bacterium_g__Allobaculum                                       |
| OTU640 | p__Firmicutes     | c__Clostridia            | o__Clostridiales      | f__Ruminococcales                              | g__norank_f__Ruminococcaceae               | s__unclassified_g__norank_f__Ruminococcaceae                                 |
| OTU476 | p__Bacteroidetes  | c__Bacteroidia           | o__Bacteroidales      | f__Bacteroidales                               | g__norank_f__Bacteroidales_S24-7_group     | s__uncultured_bacterium_g__norank_f__Bacteroidales_S24-7_group               |
| OTU536 | p__Bacteroidetes  | c__Bacteroidia           | o__Bacteroidales      | f__Bacteroidales                               | g__norank_f__Bacteroidales_S24-7_group     | s__unclassified_g__norank_f__Bacteroidales_S24-7_group                       |
| OTU5   | p__Firmicutes     | c__Erysipelotrichi       | o__Erysipelotrichi    | f__Erysipelotrichi                             | g__unclassified_f__Erysipelotrichaceae     | s__unclassified_f__Erysipelotrichaceae                                       |
| OTU94  | p__Bacteroidetes  | c__Bacteroidia           | o__Bacteroidales      | f__Bacteroidales                               | g__norank_f__Bacteroidales_S24-7_group     | s__uncultured_Bacteroidales_bacterium_g__norank_f__Bacteroidales_S24-7_group |



|        |                 |                 |                    |                  |                            |                                  |                         |                            |                                  |
|--------|-----------------|-----------------|--------------------|------------------|----------------------------|----------------------------------|-------------------------|----------------------------|----------------------------------|
| OTU658 | p__unclassified | c__unclassified | o__unclassified    | f__unclassified  | g__unclassified            | k__norank                        | s__unclassified         | k__norank                  |                                  |
| OTU564 | p__Bacteroidet  | c__Bacteroidia  | o__Bacteroidales   | f__Rikenellaceae | g__Alistipes               |                                  | s__uncultured_bacterium | g__Alistipes               |                                  |
| OTU193 | p__Actinobacte  | c__Actinobacte  | o__Coriobacteria   | f__Coriobacteri  | g__Enterorhabdus           |                                  | s__uncultured_bacterium | g__Enterorhabdus           |                                  |
| OTU624 | p__Firmicutes   | c__Clostridia   | o__Clostridiales   | f__unclassified  | g__unclassified            | o__Clostridiales                 | s__unclassified         | o__Clostridiales           |                                  |
| OTU238 | p__Firmicutes   | c__Bacilli      | o__Lactobacillales | f__Lactobacilla  | g__Lactobacillus           |                                  | s__Lactobacillus        | intestinalis               |                                  |
| OTU338 | p__Firmicutes   | c__Clostridia   | o__Clostridiales   | f__Ruminococc    | g__Anaerotruncus           |                                  | s__uncultured_bacterium | g__Anaerotruncus           |                                  |
| OTU334 | p__Firmicutes   | c__Clostridia   | o__Clostridiales   | f__Ruminococc    | g__Anaerotruncus           |                                  | s__uncultured_bacterium | g__Anaerotruncus           |                                  |
| OTU121 | p__Firmicutes   | c__Clostridia   | o__Clostridiales   | f__Lachnospira   | g__norank                  | f__Lachnospiraceae               | s__unclassified         | g__norank                  | f__Lachnospiraceae               |
| OTU282 | p__Firmicutes   | c__Clostridia   | o__Clostridiales   | f__Lachnospira   | g__norank                  | f__Lachnospiraceae               | s__unclassified         | g__norank                  | f__Lachnospiraceae               |
| OTU435 | p__Firmicutes   | c__Clostridia   | o__Clostridiales   | f__Ruminococc    | g__Oscillibacter           |                                  | s__unclassified         | g__Oscillibacter           |                                  |
| OTU348 | p__Proteobacte  | c__Deltaproteo  | o__Desulfovibric   | f__Desulfovibri  | g__Desulfovibrio           |                                  | s__unclassified         | g__Desulfovibrio           |                                  |
| OTU115 | p__Firmicutes   | c__Clostridia   | o__Clostridiales   | f__Ruminococc    | g__Ruminococcus_1          |                                  | s__unclassified         | g__Ruminococcus_1          |                                  |
| OTU660 | p__Proteobacte  | c__Alphaproteo  | o__Caulobacteri    | f__Caulobacteri  | g__Brevundimonas           |                                  | s__Brevundimonas        | nasdae                     |                                  |
| OTU575 | p__Firmicutes   | c__Clostridia   | o__Clostridiales   | f__Ruminococc    | g__unclassified            | f__Ruminococcaceae               | s__unclassified         | f__Ruminococcaceae         |                                  |
| OTU152 | p__Actinobacte  | c__Actinobacte  | o__Corynebacter    | f__Nocardia      | g__Rhodococcus             |                                  | s__unclassified         | g__Rhodococcus             |                                  |
| OTU90  | p__Firmicutes   | c__Clostridia   | o__Clostridiales   | f__Ruminococc    | g__unclassified            | f__Ruminococcaceae               | s__unclassified         | f__Ruminococcaceae         |                                  |
| OTU589 | p__Firmicutes   | c__Clostridia   | o__Clostridiales   | f__Lachnospira   | g__unclassified            | f__Lachnospiraceae               | s__unclassified         | f__Lachnospiraceae         |                                  |
| OTU580 | p__Bacteroidet  | c__Bacteroidia  | o__Bacteroidales   | f__Porphyromo    | g__Odoribacter             |                                  | s__uncultured_bacterium | g__Odoribacter             |                                  |
| OTU290 | p__Firmicutes   | c__Clostridia   | o__Clostridiales   | f__Ruminococc    | g__Anaerotruncus           |                                  | s__uncultured_bacterium | g__Anaerotruncus           |                                  |
| OTU254 | p__Firmicutes   | c__Clostridia   | o__Clostridiales   | f__Ruminococc    | g__norank                  | f__Ruminococcaceae               | s__unclassified         | g__norank                  | f__Ruminococcaceae               |
| OTU447 | p__Firmicutes   | c__Clostridia   | o__Clostridiales   | f__Lachnospira   | g__norank                  | f__Lachnospiraceae               | s__unclassified         | g__norank                  | f__Lachnospiraceae               |
| OTU177 | p__Bacteroidet  | c__Bacteroidia  | o__Bacteroidales   | f__Bacteroidale  | g__norank                  | f__Bacteroidales_S24-7_group     | s__uncultured_bacterium | g__norank                  | f__Bacteroidales_S24-7           |
| OTU265 | p__Bacteroidet  | c__Bacteroidia  | o__Bacteroidales   | f__Bacteroidale  | g__norank                  | f__Bacteroidales_S24-7_group     | s__uncultured_bacterium | g__norank                  | f__Bacteroidales_S24-7           |
| OTU472 | p__Proteobacte  | c__Deltaproteo  | o__Desulfovibric   | f__Desulfovibri  | g__Desulfovibrio           |                                  | s__unclassified         | g__Desulfovibrio           |                                  |
| OTU673 | p__Firmicutes   | c__Clostridia   | o__Clostridiales   | f__Ruminococc    | g__Ruminococcaceae_UCG-014 |                                  | s__unclassified         | g__Ruminococcaceae_UCG-014 |                                  |
| OTU439 | p__Firmicutes   | c__Clostridia   | o__Clostridiales   | f__Clostridiales | g__norank                  | f__Clostridiales_vadinBB60_group | s__uncultured_bacterium | g__norank                  | f__Clostridiales_vadinBB60_group |
| OTU253 | p__Firmicutes   | c__Clostridia   | o__Clostridiales   | f__Lachnospira   | g__unclassified            | f__Lachnospiraceae               | s__unclassified         | f__Lachnospiraceae         |                                  |
| OTU171 | p__Bacteroidet  | c__Bacteroidia  | o__Bacteroidales   | f__Bacteroidale  | g__norank                  | f__Bacteroidales_S24-7_group     | s__uncultured_bacterium | g__norank                  | f__Bacteroidales_S24-7           |
| OTU388 | p__Firmicutes   | c__Clostridia   | o__Clostridiales   | f__Clostridiales | g__norank                  | f__Clostridiales_vadinBB60_group | s__uncultured_bacterium | g__norank                  | f__Clostridiales_vadinBB60_group |
| OTU662 | p__Firmicutes   | c__Erysipelotri | o__Erysipelotric   | f__Erysipelotric | g__Erysipelatoclostridium  |                                  | s__uncultured_bacterium | g__Erysipelatoclostridium  |                                  |
| OTU607 | p__Bacteroidet  | c__Bacteroidia  | o__Bacteroidales   | f__unclassified  | g__unclassified            | o__Bacteroidales                 | s__unclassified         | o__Bacteroidales           |                                  |
| OTU505 | p__Firmicutes   | c__Clostridia   | o__Clostridiales   | f__Ruminococc    | g__unclassified            | f__Ruminococcaceae               | s__unclassified         | f__Ruminococcaceae         |                                  |
| OTU215 | p__Firmicutes   | c__Clostridia   | o__Clostridiales   | f__Ruminococc    | g__Subdoligranulum         |                                  | s__uncultured_bacterium | g__Subdoligranulum         |                                  |
| OTU547 | p__Bacteroidet  | c__Bacteroidia  | o__Bacteroidales   | f__Bacteroidale  | g__norank                  | f__Bacteroidales_S24-7_group     | s__uncultured_bacterium | g__norank                  | f__Bacteroidales_S24-7           |
| OTU300 | p__Firmicutes   | c__Clostridia   | o__Clostridiales   | f__Ruminococc    | g__Ruminiclostridium_9     |                                  | s__uncultured_organism  | g__Ruminiclostridium_9     |                                  |
| OTU304 | p__Firmicutes   | c__Clostridia   | o__Clostridiales   | f__Lachnospira   | g__unclassified            | f__Lachnospiraceae               | s__unclassified         | f__Lachnospiraceae         |                                  |
| OTU173 | p__Firmicutes   | c__Bacilli      | o__Bacillales      | f__Staphylococ   | g__Staphylococcus          |                                  | s__Staphylococcus       | nepalensis                 |                                  |
| OTU714 | p__Proteobacte  | c__Deltaproteo  | o__Desulfovibric   | f__Desulfovibri  | g__Desulfovibrio           |                                  | s__uncultured_bacterium | g__Desulfovibrio           |                                  |
| OTU430 | p__Proteobacte  | c__Alphaproteo  | o__Rhodospirilla   | f__Rhodospirill  | g__norank                  | f__Rhodospirillaceae             | s__unclassified         | g__norank                  | f__Rhodospirillaceae             |

|        |                |                 |                   |                  |                             |                              |                                               |                             |                              |
|--------|----------------|-----------------|-------------------|------------------|-----------------------------|------------------------------|-----------------------------------------------|-----------------------------|------------------------------|
| OTU696 | p__Firmicutes  | c__Clostridia   | o__Clostridiales  | f__Lachnospira   | g__unclassified             | f__Lachnospiraceae           | s__unclassified                               | f__Lachnospiraceae          |                              |
| OTU297 | p__Firmicutes  | c__Clostridia   | o__Clostridiales  | f__Ruminococc    | g__unclassified             | f__Ruminococcaceae           | s__unclassified                               | f__Ruminococcaceae          |                              |
| OTU330 | p__Firmicutes  | c__Clostridia   | o__Clostridiales  | f__Lachnospira   | g__norank                   | f__Lachnospiraceae           | s__unclassified                               | g__norank                   | f__Lachnospiraceae           |
| OTU292 | p__Actinobacte | c__Actinobacte  | o__Coriobacteria  | f__Coriobacteri  | g__Coriobacteriaceae        | UCG-002                      | s__uncultured_bacterium                       | g__Coriobacteriaceae        | UCG-002                      |
| OTU380 | p__Bacteroidet | c__Bacteroidia  | o__Bacteroidales  | f__Bacteroidale  | g__norank                   | f__Bacteroidales_S24-7_group | s__uncultured_Bacteroidales_bacterium         | g__norank                   | f__Bacte                     |
| OTU230 | p__Firmicutes  | c__Clostridia   | o__Clostridiales  | f__Ruminococc    | g__Oscillibacter            |                              | s__uncultured_bacterium                       | g__Oscillibacter            |                              |
| OTU337 | p__Firmicutes  | c__Clostridia   | o__Clostridiales  | f__Ruminococc    | g__Anaerotruncus            |                              | s__uncultured_bacterium                       | g__Anaerotruncus            |                              |
| OTU529 | p__Bacteroidet | c__Bacteroidia  | o__Bacteroidales  | f__Prevotellace  | g__unclassified             | f__Prevotellaceae            | s__unclassified                               | f__Prevotellaceae           |                              |
| OTU306 | p__Firmicutes  | c__Clostridia   | o__Clostridiales  | f__Lachnospira   | g__Lachnospiraceae          | NK4A136_group                | s__uncultured_bacterium                       | g__Lachnospiraceae          | NK4A136_gr                   |
| OTU176 | p__Bacteroidet | c__Bacteroidia  | o__Bacteroidales  | f__Bacteroidale  | g__norank                   | f__Bacteroidales_S24-7_group | s__uncultured_Bacteroidales_bacterium         | g__norank                   | f__Bacte                     |
| OTU692 | p__Firmicutes  | c__unclassified | o__unclassified   | f__unclassified  | g__unclassified             | p__Firmicutes                | s__unclassified                               | p__Firmicutes               |                              |
| OTU543 | p__Bacteroidet | c__Bacteroidia  | o__Bacteroidales  | f__Bacteroidale  | g__norank                   | f__Bacteroidales_S24-7_group | s__unclassified                               | g__norank                   | f__Bacteroidales_S24-7_group |
| OTU125 | p__Firmicutes  | c__Clostridia   | o__Clostridiales  | f__Lachnospira   | g__Lachnospiraceae          | NK4A136_group                | s__unclassified                               | g__Lachnospiraceae          | NK4A136_group                |
| OTU155 | p__Cyanobacte  | c__Cyanobacte   | o__Gastranaerop   | f__norank        | o__(g__norank               | o__Gastranaerophilales       | s__uncultured_bacterium                       | g__norank                   | o__Gastranaerophilales       |
| OTU314 | p__Firmicutes  | c__Erysipelotri | o__Erysipelotricl | f__Erysipelotric | g__Allobaculum              |                              | s__uncultured_bacterium                       | g__Allobaculum              |                              |
| OTU595 | p__Firmicutes  | c__Clostridia   | o__Clostridiales  | f__Ruminococc    | g__Ruminococcaceae          | UCG-014                      | s__unclassified                               | g__Ruminococcaceae          | UCG-014                      |
| OTU117 | p__Firmicutes  | c__Clostridia   | o__Clostridiales  | f__Lachnospira   | g__Roseburia                |                              | s__uncultured_bacterium                       | g__Roseburia                |                              |
| OTU690 | p__Firmicutes  | c__Clostridia   | o__Clostridiales  | f__Lachnospira   | g__norank                   | f__Lachnospiraceae           | s__unclassified                               | g__norank                   | f__Lachnospiraceae           |
| OTU644 | p__Firmicutes  | c__Clostridia   | o__Clostridiales  | f__Ruminococc    | g__Ruminiclostridium        |                              | s__unclassified                               | g__Ruminiclostridium        |                              |
| OTU375 | p__Firmicutes  | c__Clostridia   | o__Clostridiales  | f__Ruminococc    | g__Ruminococcaceae          | UCG-014                      | s__unclassified                               | g__Ruminococcaceae          | UCG-014                      |
| OTU546 | p__Firmicutes  | c__Clostridia   | o__Clostridiales  | f__Clostridiace  | g__Candidatus_Arthromitus   |                              | s__Candidatus_Arthromitus_sp._SFB-mouse-Japan |                             |                              |
| OTU628 | p__Firmicutes  | c__Clostridia   | o__Clostridiales  | f__Ruminococc    | g__Ruminiclostridium        |                              | s__uncultured_bacterium                       | g__Ruminiclostridium        |                              |
| OTU590 | p__Firmicutes  | c__Clostridia   | o__Clostridiales  | f__Ruminococc    | g__Ruminococcaceae          | UCG-014                      | s__unclassified                               | g__Ruminococcaceae          | UCG-014                      |
| OTU400 | p__Saccharibac | c__Unknown_C    | o__Unknown_Or     | f__Unknown_F     | g__Candidatus_Saccharimonas |                              | s__uncultured_bacterium                       | g__Candidatus_Saccharimonas |                              |
| OTU198 | p__Bacteroidet | c__Bacteroidia  | o__Bacteroidales  | f__Bacteroidale  | g__norank                   | f__Bacteroidales_S24-7_group | s__uncultured_Bacteroidales_bacterium         | g__norank                   | f__Bacte                     |
| OTU9   | p__Tenericutes | c__Mollicutes   | o__Mollicutes     | f__norank        | o_!g__norank                | o__Mollicutes_RF9            | s__uncultured_bacterium                       | g__norank                   | o__Mollicutes_RF9            |
| OTU88  | p__Proteobacte | c__Deltaproteo  | o__Desulfovibric  | f__Desulfovibri  | g__Desulfovibrio            |                              | s__Desulfovibrio_sp._UNSW3caefatS             |                             |                              |
| OTU623 | p__Tenericutes | c__Mollicutes   | o__Anaeroplasm    | f__Anaeroplasm   | g__Anaeroplasma             |                              | s__unclassified                               | g__Anaeroplasma             |                              |
| OTU212 | p__Firmicutes  | c__Clostridia   | o__Clostridiales  | f__Ruminococc    | g__Ruminococcaceae          | UCG-010                      | s__uncultured_bacterium                       | g__Ruminococcaceae          | UCG-010                      |
| OTU615 | p__Firmicutes  | c__Clostridia   | o__Clostridiales  | f__Lachnospira   | g__norank                   | f__Lachnospiraceae           | s__uncultured_bacterium                       | g__norank                   | f__Lachnospiraceae           |
| OTU352 | p__Firmicutes  | c__Clostridia   | o__Clostridiales  | f__Lachnospira   | g__Roseburia                |                              | s__unclassified                               | g__Roseburia                |                              |
| OTU120 | p__Firmicutes  | c__Clostridia   | o__Clostridiales  | f__Lachnospira   | g__unclassified             | f__Lachnospiraceae           | s__unclassified                               | f__Lachnospiraceae          |                              |
| OTU237 | p__Firmicutes  | c__Clostridia   | o__Clostridiales  | f__Lachnospira   | g__norank                   | f__Lachnospiraceae           | s__unclassified                               | g__norank                   | f__Lachnospiraceae           |
| OTU22  | p__Firmicutes  | c__Clostridia   | o__Clostridiales  | f__Lachnospira   | g__Roseburia                |                              | s__unclassified                               | g__Roseburia                |                              |
| OTU451 | p__Bacteroidet | c__Bacteroidia  | o__Bacteroidales  | f__Rikenellace   | g__Alistipes                |                              | s__uncultured_bacterium                       | g__Alistipes                |                              |
| OTU508 | p__Firmicutes  | c__Clostridia   | o__Clostridiales  | f__Ruminococc    | g__Oscillibacter            |                              | s__[Clostridium]_leptum                       | g__Oscillibacter            |                              |
| OTU570 | p__Firmicutes  | c__Clostridia   | o__Clostridiales  | f__Lachnospira   | g__norank                   | f__Lachnospiraceae           | s__Lachnospiraceae_bacterium                  | DW12                        |                              |
| OTU231 | p__Tenericutes | c__Mollicutes   | o__Mollicutes     | f__norank        | o_!g__norank                | o__Mollicutes_RF9            | s__unclassified                               | g__norank                   | o__Mollicutes_RF9            |
| OTU46  | p__Proteobacte | c__Alphaproteo  | o__Rhodospirilla  | f__Rhodospirill  | g__norank                   | f__Rhodospirillaceae         | s__uncultured_rumen_bacterium                 | g__norank                   | f__Rhodospirill              |

|        |                |                |                  |                                                |                                            |                                                           |
|--------|----------------|----------------|------------------|------------------------------------------------|--------------------------------------------|-----------------------------------------------------------|
| OTU236 | p__Firmicutes  | c__Clostridia  | o__Clostridiales | f__Ruminococc                                  | g__Anaerotruncus                           | s__uncultured_bacterium_g__Anaerotruncus                  |
| OTU583 | p__Firmicutes  | c__Clostridia  | o__Clostridiales | f__Lachnospira                                 | g__norank_f__Lachnospiraceae               | s__Clostridium_sp._Culture-27                             |
| OTU311 | p__Bacteroidet | c__Bacteroidia | o__Bacteroidales | f__unclassified                                | g__unclassified_o__Bacteroidales           | s__unclassified_o__Bacteroidales                          |
| OTU470 | p__Firmicutes  | c__Clostridia  | o__Clostridiales | f__Lachnospira                                 | g__unclassified_f__Lachnospiraceae         | s__unclassified_f__Lachnospiraceae                        |
| OTU412 | p__Firmicutes  | c__Clostridia  | o__Clostridiales | f__Lachnospira                                 | g__Blautia                                 | s__Blautia_coccoides_g__Blautia                           |
| OTU473 | p__Firmicutes  | c__Clostridia  | o__Clostridiales | f__Ruminococc                                  | g__Ruminococcaceae_UCG-014                 | s__[Clostridium]_papyrosolvens_g__Ruminococcaceae_UCG     |
| OTU248 | p__Firmicutes  | c__Clostridia  | o__Clostridiales | f__Ruminococc                                  | g__Ruminococcaceae_NK4A214_group           | s__unclassified_g__Ruminococcaceae_NK4A214_group          |
| OTU699 | p__Proteobacte | c__Deltaproteo | o__Desulfovibric | f__Desulfovibri                                | g__Desulfovibrio                           | s__unclassified_g__Desulfovibrio                          |
| OTU250 | p__Firmicutes  | c__Clostridia  | o__Clostridiales | f__Lachnospira                                 | g__Lachnospiraceae_NK4A136_group           | s__uncultured_bacterium_g__Lachnospiraceae_NK4A136_gr     |
| OTU576 | p__Bacteroidet | c__Bacteroidia | o__Bacteroidales | f__Bacteroidale                                | g__norank_f__Bacteroidales_S24-7_group     | s__uncultured_bacterium_g__norank_f__Bacteroidales_S24-7  |
| OTU1   | p__Firmicutes  | c__Clostridia  | o__Clostridiales | f__Clostridiales                               | g__norank_f__Clostridiales_vadinBB60_group | s__uncultured_bacterium_g__norank_f__Clostridiales_vadinF |
| OTU339 | p__Firmicutes  | c__Clostridia  | o__Clostridiales | f__Ruminococc                                  | g__Ruminococcaceae_UCG-013                 | s__unclassified_g__Ruminococcaceae_UCG-013                |
| OTU425 | p__Cyanobacte  | c__Cyanobacte  | o__Gastranaerop  | f__norank_o__(g__norank_o__Gastranaerophilales |                                            | s__uncultured_bacterium_g__norank_o__Gastranaerophilales  |
| OTU76  | p__Firmicutes  | c__Clostridia  | o__Clostridiales | f__Ruminococc                                  | g__Ruminococcaceae_UCG-005                 | s__uncultured_Clostridiales_bacterium_g__Ruminococcaceae  |
| OTU695 | p__Proteobacte | c__Gammaprot   | o__Aeromonadal   | f__Succinivibri                                | g__Anaerobiospirillum                      | s__unclassified_g__Anaerobiospirillum                     |
| OTU647 | p__Firmicutes  | c__Clostridia  | o__Clostridiales | f__Ruminococc                                  | g__Oscillibacter                           | s__unclassified_g__Oscillibacter                          |
| OTU409 | p__Firmicutes  | c__Clostridia  | o__Clostridiales | f__Ruminococc                                  | g__Butyricococcus                          | s__unclassified_g__Butyricococcus                         |
| OTU620 | p__Firmicutes  | c__Clostridia  | o__Clostridiales | f__Clostridiales                               | g__norank_f__Clostridiales_vadinBB60_group | s__uncultured_bacterium_g__norank_f__Clostridiales_vadinF |
| OTU606 | p__Bacteroidet | c__Bacteroidia | o__Bacteroidales | f__Bacteroidale                                | g__norank_f__Bacteroidales_S24-7_group     | s__uncultured_bacterium_g__norank_f__Bacteroidales_S24-7  |
| OTU202 | p__Actinobacte | c__Actinobacte | o__Coriobacteria | f__Coriobacteri                                | g__Enterorhabdus                           | s__Enterorhabdus_mucosicola                               |
| OTU382 | p__Firmicutes  | c__Clostridia  | o__Clostridiales | f__Lachnospira                                 | g__Lachnospiraceae_NK4A136_group           | s__uncultured_bacterium_g__Lachnospiraceae_NK4A136_gr     |
| OTU192 | p__Bacteroidet | c__Bacteroidia | o__Bacteroidales | f__Rikenellacea                                | g__Alistipes                               | s__uncultured_bacterium_g__Alistipes                      |
| OTU191 | p__Bacteroidet | c__Bacteroidia | o__Bacteroidales | f__Rikenellacea                                | g__Alistipes                               | s__uncultured_bacterium_g__Alistipes                      |
| OTU73  | p__Firmicutes  | c__Clostridia  | o__Clostridiales | f__Ruminococc                                  | g__Ruminiclostridium_9                     | s__unclassified_g__Ruminiclostridium_9                    |
| OTU222 | p__Actinobacte | c__Actinobacte | o__Bifidobacteri | f__Bifidobacter                                | g__Bifidobacterium                         | s__Bifidobacterium_pseudocatenulatum_DSM_20438__JCM       |
| OTU134 | p__Proteobacte | c__Epsilonprot | o__Campylobact   | f__Helicobacter                                | g__Helicobacter                            | s__Helicobacter_ganmani                                   |
| OTU208 | p__Bacteroidet | c__Bacteroidia | o__Bacteroidales | f__Bacteroidale                                | g__norank_f__Bacteroidales_S24-7_group     | s__uncultured_bacterium_g__norank_f__Bacteroidales_S24-7  |
| OTU518 | p__Bacteroidet | c__Bacteroidia | o__Bacteroidales | f__Bacteroidale                                | g__norank_f__Bacteroidales_S24-7_group     | s__unclassified_g__norank_f__Bacteroidales_S24-7_group    |
| OTU138 | p__Firmicutes  | c__Clostridia  | o__Clostridiales | f__Ruminococc                                  | g__Anaerotruncus                           | s__uncultured_bacterium_g__Anaerotruncus                  |
| OTU184 | p__Firmicutes  | c__Clostridia  | o__Clostridiales | f__Christensene                                | g__Christensenellaceae_R-7_group           | s__unclassified_g__Christensenellaceae_R-7_group          |
| OTU621 | p__Firmicutes  | c__Clostridia  | o__Clostridiales | f__Lachnospira                                 | g__norank_f__Lachnospiraceae               | s__unclassified_g__norank_f__Lachnospiraceae              |
| OTU569 | p__Firmicutes  | c__Clostridia  | o__Clostridiales | f__Lachnospira                                 | g__unclassified_f__Lachnospiraceae         | s__unclassified_f__Lachnospiraceae                        |
| OTU511 | p__Firmicutes  | c__Clostridia  | o__Clostridiales | f__Ruminococc                                  | g__Anaerotruncus                           | s__unclassified_g__Anaerotruncus                          |
| OTU641 | p__Firmicutes  | c__Clostridia  | o__Clostridiales | f__Ruminococc                                  | g__norank_f__Ruminococcaceae               | s__[Clostridium]_leptum_g__norank                         |
| OTU599 | p__Bacteroidet | c__Bacteroidia | o__Bacteroidales | f__Porphyromo                                  | g__Butyricimonas                           | s__unclassified_g__Butyricimonas                          |
| OTU141 | p__Firmicutes  | c__Clostridia  | o__Clostridiales | f__Lachnospira                                 | g__Lachnospiraceae_NK4A136_group           | s__uncultured_Clostridiales_bacterium_g__Lachnospiraceae_ |
| OTU32  | p__Firmicutes  | c__Clostridia  | o__Clostridiales | f__Ruminococc                                  | g__Anaerotruncus                           | s__unclassified_g__Anaerotruncus                          |
| OTU676 | p__Proteobacte | c__Epsilonprot | o__Campylobact   | f__Helicobacter                                | g__Helicobacter                            | s__unclassified_g__Helicobacter                           |
| OTU655 | p__Proteobacte | c__Alphaprote  | o__Rhodospirilla | f__Rhodospirill                                | g__norank_f__Rhodospirillaceae             | s__gut_metagenome_g__norank_f__Rhodospirillaceae          |

|        |                |                 |                   |                                                  |                                            |                                                           |
|--------|----------------|-----------------|-------------------|--------------------------------------------------|--------------------------------------------|-----------------------------------------------------------|
| OTU102 | p__Firmicutes  | c__Erysipelotri | o__Erysipelotricl | f__Erysipelotric                                 | g__norank_f__Erysipelotrichaceae           | s__uncultured_Erysipelotrichales_bacterium_g__norank      |
| OTU396 | p__Tenericutes | c__Mollicutes   | o__Mollicutes_RF  | f__norank_o__l                                   | g__norank_o__Mollicutes_RF9                | s__unclassified_g__norank_o__Mollicutes_RF9               |
| OTU617 | p__Firmicutes  | c__Clostridia   | o__Clostridiales  | f__Lachnospira                                   | g__Blautia                                 | s__unclassified_g__Blautia                                |
| OTU677 | p__Firmicutes  | c__Clostridia   | o__Clostridiales  | f__Ruminococc                                    | g__Ruminiclostridium_6                     | s__uncultured_bacterium_g__Ruminiclostridium_6            |
| OTU341 | p__Spirochaeta | c__Spirochaete  | o__Spirochaetale  | f__Spirochaeta                                   | g__Treponema_2                             | s__unclassified_g__Treponema_2                            |
| OTU394 | p__Firmicutes  | c__Bacilli      | o__Lactobacillal  | f__Lactobacilla                                  | g__Lactobacillus                           | s__Lactobacillus_johnsonii                                |
| OTU563 | p__Bacteroidet | c__Bacteroidia  | o__Bacteroidales  | f__Rikenellacea                                  | g__Alistipes                               | s__Faecalibacterium_prausnitzii_g__Alistipes              |
| OTU347 | p__Firmicutes  | c__Clostridia   | o__Clostridiales  | f__Lachnospira                                   | g__norank_f__Lachnospiraceae               | s__uncultured_bacterium_g__norank_f__Lachnospiraceae      |
| OTU630 | p__Bacteroidet | c__Bacteroidia  | o__Bacteroidales  | f__Prevotellace                                  | g__Prevotellaceae_UCG-001                  | s__uncultured_Bacteroidales_bacterium_g__Prevotellaceae_U |
| OTU668 | p__Firmicutes  | c__Clostridia   | o__Clostridiales  | f__Lachnospira                                   | g__norank_f__Lachnospiraceae               | s__Lachnospiraceae_bacterium_DW8                          |
| OTU609 | p__Bacteroidet | c__Bacteroidia  | o__Bacteroidales  | f__Bacteroidale                                  | g__norank_f__Bacteroidales_S24-7_group     | s__uncultured_bacterium_g__norank_f__Bacteroidales_S24-7  |
| OTU364 | p__Firmicutes  | c__Clostridia   | o__Clostridiales  | f__Ruminococc                                    | g__Anaerotruncus                           | s__unclassified_g__Anaerotruncus                          |
| OTU42  | p__Bacteroidet | c__Bacteroidia  | o__Bacteroidales  | f__Bacteroidale                                  | g__norank_f__Bacteroidales_S24-7_group     | s__unclassified_g__norank_f__Bacteroidales_S24-7_group    |
| OTU416 | p__Firmicutes  | c__Clostridia   | o__Clostridiales  | f__Ruminococc                                    | g__Ruminococcus_1                          | s__unclassified_g__Ruminococcus_1                         |
| OTU561 | p__Bacteroidet | c__Bacteroidia  | o__Bacteroidales  | f__Bacteroidale                                  | g__norank_f__Bacteroidales_S24-7_group     | s__uncultured_bacterium_g__norank_f__Bacteroidales_S24-7  |
| OTU486 | p__Bacteroidet | c__Bacteroidia  | o__Bacteroidales  | f__Rikenellacea                                  | g__Rikenella                               | s__uncultured_bacterium_g__Rikenella                      |
| OTU718 | p__Firmicutes  | c__Clostridia   | o__Clostridiales  | f__Ruminococc                                    | g__Butyricicoccus                          | s__unclassified_g__Butyricicoccus                         |
| OTU163 | p__Firmicutes  | c__Clostridia   | o__Clostridiales  | f__Lachnospira                                   | g__Lachnospiraceae_NK4A136_group           | s__uncultured_bacterium_g__Lachnospiraceae_NK4A136_gr     |
| OTU674 | p__Firmicutes  | c__Clostridia   | o__Clostridiales  | f__Lachnospira                                   | g__Roseburia                               | s__uncultured_bacterium_g__Roseburia                      |
| OTU197 | p__Bacteroidet | c__Bacteroidia  | o__Bacteroidales  | f__Bacteroidale                                  | g__norank_f__Bacteroidales_S24-7_group     | s__uncultured_bacterium_g__norank_f__Bacteroidales_S24-7  |
| OTU119 | p__Firmicutes  | c__Clostridia   | o__Clostridiales  | f__Lachnospira                                   | g__unclassified_f__Lachnospiraceae         | s__unclassified_f__Lachnospiraceae                        |
| OTU586 | p__Firmicutes  | c__Clostridia   | o__Clostridiales  | f__Clostridiales                                 | g__norank_f__Clostridiales_vadinBB60_group | s__unclassified_g__norank_f__Clostridiales_vadinBB60_gro  |
| OTU332 | p__Proteobacte | c__Alphaprotec  | o__Rhodospirilla  | f__Rhodospirill                                  | g__norank_f__Rhodospirillaceae             | s__gut_metagenome_g__norank_f__Rhodospirillaceae          |
| OTU646 | p__Tenericutes | c__Mollicutes   | o__Mollicutes_RF  | f__norank_o__l                                   | g__norank_o__Mollicutes_RF9                | s__uncultured_bacterium_g__norank_o__Mollicutes_RF9       |
| OTU437 | p__Firmicutes  | c__Erysipelotri | o__Erysipelotricl | f__Erysipelotric                                 | g__unclassified_f__Erysipelotrichaceae     | s__unclassified_f__Erysipelotrichaceae                    |
| OTU289 | p__Firmicutes  | c__Clostridia   | o__Clostridiales  | f__Lachnospira                                   | g__norank_f__Lachnospiraceae               | s__uncultured_bacterium_g__norank_f__Lachnospiraceae      |
| OTU704 | p__Firmicutes  | c__Clostridia   | o__Clostridiales  | f__Lachnospira                                   | g__norank_f__Lachnospiraceae               | s__unclassified_g__norank_f__Lachnospiraceae              |
| OTU318 | p__Bacteroidet | c__Bacteroidia  | o__Bacteroidales  | f__Bacteroidale                                  | g__norank_f__Bacteroidales_S24-7_group     | s__uncultured_bacterium_g__norank_f__Bacteroidales_S24-7  |
| OTU376 | p__Firmicutes  | c__Clostridia   | o__Clostridiales  | f__Clostridiales                                 | g__norank_f__Clostridiales_vadinBB60_group | s__unclassified_g__norank_f__Clostridiales_vadinBB60_gro  |
| OTU512 | p__Bacteroidet | c__Bacteroidia  | o__Bacteroidales  | f__Bacteroidale                                  | g__norank_f__Bacteroidales_S24-7_group     | s__uncultured_bacterium_g__norank_f__Bacteroidales_S24-7  |
| OTU353 | p__Bacteroidet | c__Bacteroidia  | o__Bacteroidales  | f__Bacteroidale                                  | g__norank_f__Bacteroidales_S24-7_group     | s__uncultured_bacterium_g__norank_f__Bacteroidales_S24-7  |
| OTU92  | p__Bacteroidet | c__Bacteroidia  | o__Bacteroidales  | f__Bacteroidale                                  | g__norank_f__Bacteroidales_S24-7_group     | s__uncultured_bacterium_g__norank_f__Bacteroidales_S24-7  |
| OTU597 | p__Bacteroidet | c__Bacteroidia  | o__Bacteroidales  | f__Bacteroidale                                  | g__norank_f__Bacteroidales_S24-7_group     | s__uncultured_bacterium_g__norank_f__Bacteroidales_S24-7  |
| OTU568 | p__Bacteroidet | c__Bacteroidia  | o__Bacteroidales  | f__Bacteroidale                                  | g__norank_f__Bacteroidales_S24-7_group     | s__uncultured_bacterium_g__norank_f__Bacteroidales_S24-7  |
| OTU172 | p__Bacteroidet | c__Bacteroidia  | o__Bacteroidales  | f__unclassified_g__unclassified_o__Bacteroidales |                                            | s__unclassified_o__Bacteroidales                          |
| OTU417 | p__Proteobacte | c__Epsilonprot  | o__Campylobact    | f__Helicobacter                                  | g__Helicobacter                            | s__Helicobacter_bilis                                     |
| OTU441 | p__Bacteroidet | c__Bacteroidia  | o__Bacteroidales  | f__Rikenellacea                                  | g__Alistipes                               | s__Alistipes_indistinctus_YIT_12060                       |
| OTU105 | p__Bacteroidet | c__Bacteroidia  | o__Bacteroidales  | f__Bacteroidale                                  | g__norank_f__Bacteroidales_S24-7_group     | s__uncultured_Bacteroidales_bacterium_g__norank_f__Bacte  |
| OTU362 | p__Firmicutes  | c__Clostridia   | o__Clostridiales  | f__Lachnospira                                   | g__norank_f__Lachnospiraceae               | s__unclassified_g__norank_f__Lachnospiraceae              |

|        |                 |                 |                   |                   |                                            |                                                                                  |
|--------|-----------------|-----------------|-------------------|-------------------|--------------------------------------------|----------------------------------------------------------------------------------|
| OTU142 | p__Firmicutes   | c__Clostridia   | o__Clostridiales  | f__Clostridiales  | g__norank_f__Clostridiales_vadinBB60_group | s__unclassified_g__norank_f__Clostridiales_vadinBB60_group                       |
| OTU588 | p__Firmicutes   | c__Clostridia   | o__Clostridiales  | f__Lachnospirae   | g__unclassified_f__Lachnospiraceae         | s__unclassified_f__Lachnospiraceae                                               |
| OTU601 | p__Firmicutes   | c__Clostridia   | o__Clostridiales  | f__Clostridiales  | g__norank_f__Clostridiales_vadinBB60_group | s__unclassified_g__norank_f__Clostridiales_vadinBB60_group                       |
| OTU63  | p__Firmicutes   | c__Clostridia   | o__Clostridiales  | f__Lachnospirae   | g__Lachnospiraceae_UCG-006                 | s__uncultured_bacterium_g__Lachnospiraceae_UCG-006                               |
| OTU183 | p__Firmicutes   | c__Clostridia   | o__Clostridiales  | f__Lachnospirae   | g__unclassified_f__Lachnospiraceae         | s__unclassified_f__Lachnospiraceae                                               |
| OTU50  | p__Firmicutes   | c__Clostridia   | o__Clostridiales  | f__Lachnospirae   | g__Lachnospiraceae_NK4A136_group           | s__unclassified_g__Lachnospiraceae_NK4A136_group                                 |
| OTU539 | p__Firmicutes   | c__Clostridia   | o__Clostridiales  | f__Ruminococc     | g__Ruminococcaceae_UCG-014                 | s__unclassified_g__Ruminococcaceae_UCG-014                                       |
| OTU216 | p__Actinobacte  | c__Actinobacte  | o__Bifidobacteri  | f__Bifidobacter   | g__Bifidobacterium                         | s__unclassified_g__Bifidobacterium                                               |
| OTU143 | p__Firmicutes   | c__Clostridia   | o__Clostridiales  | f__Ruminococc     | g__Ruminococcaceae_UCG-014                 | s__uncultured_bacterium_g__Ruminococcaceae_UCG-014                               |
| OTU565 | p__unclassified | c__unclassified | o__unclassified_l | f__unclassified_k | g__unclassified_k__norank                  | s__unclassified_k__norank                                                        |
| OTU450 | p__Firmicutes   | c__Clostridia   | o__Clostridiales  | f__Ruminococc     | g__Ruminococcaceae_UCG-010                 | s__uncultured_organism_g__Ruminococcaceae_UCG-010                                |
| OTU13  | p__Bacteroidet  | c__Bacteroidia  | o__Bacteroidales  | f__Bacteroidale   | g__norank_f__Bacteroidales_S24-7_group     | s__uncultured_bacterium_g__norank_f__Bacteroidales_S24-7_group                   |
| OTU554 | p__Bacteroidet  | c__Bacteroidia  | o__Bacteroidales  | f__Prevotellace   | g__Prevotellaceae_UCG-003                  | s__unclassified_g__Prevotellaceae_UCG-003                                        |
| OTU257 | p__Firmicutes   | c__Clostridia   | o__Clostridiales  | f__Ruminococc     | g__Ruminococcaceae_UCG-014                 | s__unclassified_g__Ruminococcaceae_UCG-014                                       |
| OTU462 | p__Firmicutes   | c__Clostridia   | o__Clostridiales  | f__Lachnospirae   | g__unclassified_f__Lachnospiraceae         | s__unclassified_f__Lachnospiraceae                                               |
| OTU559 | p__Firmicutes   | c__Clostridia   | o__Clostridiales  | f__Lachnospirae   | g__unclassified_f__Lachnospiraceae         | s__unclassified_f__Lachnospiraceae                                               |
| OTU61  | p__Firmicutes   | c__Clostridia   | o__Clostridiales  | f__Lachnospirae   | g__[Eubacterium]_xylanophilum_group        | s__uncultured_bacterium_g__[Eubacterium]_xylanophilum_group                      |
| OTU272 | p__Firmicutes   | c__Clostridia   | o__Clostridiales  | f__Ruminococc     | g__Ruminococcaceae_UCG-014                 | s__unclassified_g__Ruminococcaceae_UCG-014                                       |
| OTU98  | p__Firmicutes   | c__Clostridia   | o__Clostridiales  | f__Family_XIII    | g__[Eubacterium]_nodatum_group             | s__unclassified_g__[Eubacterium]_nodatum_group                                   |
| OTU239 | p__Firmicutes   | c__Clostridia   | o__Clostridiales  | f__Ruminococc     | g__Ruminococcaceae_UCG-013                 | s__unclassified_g__Ruminococcaceae_UCG-013                                       |
| OTU356 | p__Firmicutes   | c__Clostridia   | o__Clostridiales  | f__Ruminococc     | g__Ruminococcus_1                          | s__unclassified_g__Ruminococcus_1                                                |
| OTU112 | p__Bacteroidet  | c__Bacteroidia  | o__Bacteroidales  | f__Bacteroidale   | g__norank_f__Bacteroidales_S24-7_group     | s__uncultured_bacterium_g__norank_f__Bacteroidales_S24-7_group                   |
| OTU343 | p__Firmicutes   | c__Clostridia   | o__Clostridiales  | f__Lachnospirae   | g__Lachnospiraceae_NK4A136_group           | s__uncultured_bacterium_g__Lachnospiraceae_NK4A136_group                         |
| OTU43  | p__Bacteroidet  | c__Bacteroidia  | o__Bacteroidales  | f__Bacteroidale   | g__norank_f__Bacteroidales_S24-7_group     | s__uncultured_bacterium_g__norank_f__Bacteroidales_S24-7_group                   |
| OTU66  | p__Firmicutes   | c__Clostridia   | o__Clostridiales  | f__Lachnospirae   | g__Lachnospiraceae_NK4A136_group           | s__unclassified_g__Lachnospiraceae_NK4A136_group                                 |
| OTU245 | p__Firmicutes   | c__Clostridia   | o__Clostridiales  | f__Lachnospirae   | g__Eisenbergiella                          | s__unclassified_g__Eisenbergiella                                                |
| OTU442 | p__Firmicutes   | c__Clostridia   | o__Clostridiales  | f__Lachnospirae   | g__Lachnospiraceae_UCG-010                 | s__uncultured_bacterium_g__Lachnospiraceae_UCG-010                               |
| OTU585 | p__Firmicutes   | c__Clostridia   | o__Clostridiales  | f__Lachnospirae   | g__unclassified_f__Lachnospiraceae         | s__unclassified_f__Lachnospiraceae                                               |
| OTU422 | p__Proteobacte  | c__Alphaprotec  | o__Rhodospirilla  | f__Rhodospirill   | g__norank_f__Rhodospirillaceae             | s__gut_metagenome_g__norank_f__Rhodospirillaceae                                 |
| OTU705 | p__Firmicutes   | c__Clostridia   | o__Clostridiales  | f__Lachnospirae   | g__norank_f__Lachnospiraceae               | s__unclassified_g__norank_f__Lachnospiraceae                                     |
| OTU513 | p__Bacteroidet  | c__Bacteroidia  | o__Bacteroidales  | f__Bacteroidale   | g__norank_f__Bacteroidales_S24-7_group     | s__uncultured_bacterium_g__norank_f__Bacteroidales_S24-7_group                   |
| OTU645 | p__Firmicutes   | c__Clostridia   | o__Clostridiales  | f__Ruminococc     | g__Oscillibacter                           | s__unclassified_g__Oscillibacter                                                 |
| OTU149 | p__Firmicutes   | c__Clostridia   | o__Clostridiales  | f__Lachnospirae   | g__norank_f__Lachnospiraceae               | s__uncultured_bacterium_g__norank_f__Lachnospiraceae                             |
| OTU478 | p__Firmicutes   | c__Clostridia   | o__Clostridiales  | f__Lachnospirae   | g__norank_f__Lachnospiraceae               | s__unclassified_g__norank_f__Lachnospiraceae                                     |
| OTU27  | p__Bacteroidet  | c__Bacteroidia  | o__Bacteroidales  | f__Bacteroidale   | g__norank_f__Bacteroidales_S24-7_group     | s__uncultured_bacterium_g__norank_f__Bacteroidales_S24-7_group                   |
| OTU701 | p__Firmicutes   | c__Clostridia   | o__Clostridiales  | f__Lachnospirae   | g__unclassified_f__Lachnospiraceae         | s__unclassified_f__Lachnospiraceae                                               |
| OTU391 | p__Firmicutes   | c__Clostridia   | o__Clostridiales  | f__Clostridiales  | g__norank_f__Clostridiales_vadinBB60_group | s__uncultured_Clostridiales_bacterium_g__norank_f__Clostridiales_vadinBB60_group |
| OTU182 | p__Actinobacte  | c__Actinobacte  | o__Coriobacteria  | f__Coriobacteri   | g__unclassified_f__Coriobacteriaceae       | s__unclassified_f__Coriobacteriaceae                                             |
| OTU670 | p__Firmicutes   | c__Clostridia   | o__Clostridiales  | f__Lachnospirae   | g__Lachnospiraceae_UCG-001                 | s__uncultured_bacterium_g__Lachnospiraceae_UCG-001                               |

|        |                |                 |                   |                                                |                                            |                                                           |
|--------|----------------|-----------------|-------------------|------------------------------------------------|--------------------------------------------|-----------------------------------------------------------|
| OTU199 | p__Bacteroidet | c__Bacteroidia  | o__Bacteroidales  | f__Rikenellacea                                | g__Alistipes                               | s__gut_metagenome_g__Alistipes                            |
| OTU273 | p__Bacteroidet | c__Bacteroidia  | o__Bacteroidales  | f__Bacteroidale                                | g__norank_f__Bacteroidales_S24-7_group     | s__uncultured_bacterium_g__norank_f__Bacteroidales_S24-7  |
| OTU110 | p__Actinobacte | c__Actinobacte  | o__Coriobacteria  | f__Coriobacteri                                | g__unclassified_f__Coriobacteriaceae       | s__unclassified_f__Coriobacteriaceae                      |
| OTU312 | p__Bacteroidet | c__Bacteroidia  | o__Bacteroidales  | f__Bacteroidale                                | g__norank_f__Bacteroidales_S24-7_group     | s__uncultured_bacterium_g__norank_f__Bacteroidales_S24-7  |
| OTU379 | p__Firmicutes  | c__Clostridia   | o__Clostridiales  | f__Clostridiales                               | g__norank_f__Clostridiales_vadinBB60_group | s__unclassified_g__norank_f__Clostridiales_vadinBB60_gro  |
| OTU367 | p__Bacteroidet | c__Bacteroidia  | o__Bacteroidales  | f__Prevotellace                                | g__Prevotellaceae_UCG-003                  | s__unclassified_g__Prevotellaceae_UCG-003                 |
| OTU287 | p__Firmicutes  | c__Bacilli      | o__Lactobacillak  | f__Streptococcz                                | g__Streptococcus                           | s__unclassified_g__Streptococcus                          |
| OTU584 | p__Tenericutes | c__Mollicutes   | o__Mycoplasmata   | f__Mycoplasma                                  | g__Mycoplasma                              | s__Mycoplasma_sualvi                                      |
| OTU6   | p__Tenericutes | c__Mollicutes   | o__Mollicutes_R   | f__norank_o__l                                 | g__norank_o__Mollicutes_RF9                | s__unclassified_g__norank_o__Mollicutes_RF9               |
| OTU123 | p__Firmicutes  | c__Clostridia   | o__Clostridiales  | f__Lachnospira                                 | g__unclassified_f__Lachnospiraceae         | s__unclassified_f__Lachnospiraceae                        |
| OTU133 | p__Firmicutes  | c__Clostridia   | o__Clostridiales  | f__Lachnospira                                 | g__Coproccoccus_1                          | s__unclassified_g__Coproccoccus_1                         |
| OTU686 | p__Firmicutes  | c__Clostridia   | o__Clostridiales  | f__Lachnospira                                 | g__[Eubacterium]_xylanophilum_group        | s__uncultured_bacterium_g__[Eubacterium]_xylanophilum_g   |
| OTU93  | p__Cyanobacte  | c__Cyanobacte   | o__Gastranaerop   | f__norank_o__(g__norank_o__Gastranaerophilales |                                            | s__unclassified_g__norank_o__Gastranaerophilales          |
| OTU629 | p__Bacteroidet | c__Bacteroidia  | o__Bacteroidales  | f__Bacteroidale                                | g__norank_f__Bacteroidales_S24-7_group     | s__uncultured_bacterium_g__norank_f__Bacteroidales_S24-7  |
| OTU103 | p__Tenericutes | c__Mollicutes   | o__Mollicutes_R   | f__norank_o__l                                 | g__norank_o__Mollicutes_RF9                | s__uncultured_bacterium_g__norank_o__Mollicutes_RF9       |
| OTU593 | p__Bacteroidet | c__Bacteroidia  | o__Bacteroidales  | f__Bacteroidale                                | g__norank_f__Bacteroidales_S24-7_group     | s__uncultured_bacterium_g__norank_f__Bacteroidales_S24-7  |
| OTU562 | p__Firmicutes  | c__Clostridia   | o__Clostridiales  | f__Lachnospira                                 | g__unclassified_f__Lachnospiraceae         | s__unclassified_f__Lachnospiraceae                        |
| OTU719 | p__Firmicutes  | c__Clostridia   | o__Clostridiales  | f__Ruminococ                                   | g__Ruminiclostridium                       | s__unclassified_g__Ruminiclostridium                      |
| OTU111 | p__Bacteroidet | c__Bacteroidia  | o__Bacteroidales  | f__Bacteroidale                                | g__norank_f__Bacteroidales_S24-7_group     | s__uncultured_bacterium_g__norank_f__Bacteroidales_S24-7  |
| OTU59  | p__Firmicutes  | c__Clostridia   | o__Clostridiales  | f__Ruminococ                                   | g__Anaerotruncus                           | s__uncultured_bacterium_g__Anaerotruncus                  |
| OTU453 | p__Firmicutes  | c__Clostridia   | o__Clostridiales  | f__Lachnospira                                 | g__norank_f__Lachnospiraceae               | s__unclassified_g__norank_f__Lachnospiraceae              |
| OTU23  | p__Bacteroidet | c__Bacteroidia  | o__Bacteroidales  | f__Rikenellacea                                | g__Alistipes                               | s__unclassified_g__Alistipes                              |
| OTU2   | p__Bacteroidet | c__Bacteroidia  | o__Bacteroidales  | f__Porphyromo                                  | g__Parabacteroides                         | s__unclassified_g__Parabacteroides                        |
| OTU157 | p__Proteobacte | c__Betaproteo   | o__Neisseriales   | f__Neisseriacea                                | g__unclassified_f__Neisseriaceae           | s__unclassified_f__Neisseriaceae                          |
| OTU151 | p__Firmicutes  | c__Erysipelotri | o__Erysipelotricl | f__Erysipelotric                               | g__Allobaculum                             | s__uncultured_bacterium_g__Allobaculum                    |
| OTU122 | p__Firmicutes  | c__Clostridia   | o__Clostridiales  | f__Lachnospira                                 | g__Lachnospiraceae_UCG-001                 | s__unclassified_g__Lachnospiraceae_UCG-001                |
| OTU638 | p__Firmicutes  | c__Clostridia   | o__Clostridiales  | f__Ruminococ                                   | g__Ruminococcaceae_UCG-005                 | s__uncultured_bacterium_g__Ruminococcaceae_UCG-005        |
| OTU504 | p__Tenericutes | c__Mollicutes   | o__Mollicutes_R   | f__norank_o__l                                 | g__norank_o__Mollicutes_RF9                | s__uncultured_Erysipelotrichaceae_bacterium_g__norank_o__ |
| OTU688 | p__Cyanobacte  | c__Cyanobacte   | o__Gastranaerop   | f__norank_o__(g__norank_o__Gastranaerophilales |                                            | s__unclassified_g__norank_o__Gastranaerophilales          |
| OTU383 | p__Firmicutes  | c__Bacilli      | o__Lactobacillak  | f__Lactobacilla                                | g__Lactobacillus                           | s__unclassified_g__Lactobacillus                          |
| OTU544 | p__Bacteroidet | c__Bacteroidia  | o__Bacteroidales  | f__Prevotellace                                | g__Prevotellaceae_UCG-001                  | s__uncultured_Bacteroidales_bacterium_g__Prevotellaceae_U |
| OTU109 | p__Bacteroidet | c__Bacteroidia  | o__Bacteroidales  | f__Bacteroidale                                | g__norank_f__Bacteroidales_S24-7_group     | s__uncultured_bacterium_g__norank_f__Bacteroidales_S24-7  |
| OTU266 | p__Bacteroidet | c__Bacteroidia  | o__Bacteroidales  | f__unclassified                                | g__unclassified_o__Bacteroidales           | s__unclassified_o__Bacteroidales                          |
| OTU672 | p__Firmicutes  | c__Clostridia   | o__Clostridiales  | f__Lachnospira                                 | g__norank_f__Lachnospiraceae               | s__unclassified_g__norank_f__Lachnospiraceae              |
| OTU566 | p__Bacteroidet | c__Bacteroidia  | o__Bacteroidales  | f__Bacteroidac                                 | g__Bacteroides                             | s__Bacteroides_acidifaciens                               |
| OTU551 | p__Bacteroidet | c__Bacteroidia  | o__Bacteroidales  | f__Bacteroidale                                | g__norank_f__Bacteroidales_S24-7_group     | s__uncultured_bacterium_g__norank_f__Bacteroidales_S24-7  |
| OTU285 | p__Tenericutes | c__Mollicutes   | o__Mollicutes_R   | f__norank_o__l                                 | g__norank_o__Mollicutes_RF9                | s__unclassified_g__norank_o__Mollicutes_RF9               |
| OTU604 | p__Bacteroidet | c__Bacteroidia  | o__Bacteroidales  | f__Prevotellace                                | g__unclassified_f__Prevotellaceae          | s__unclassified_f__Prevotellaceae                         |
| OTU344 | p__Firmicutes  | c__Bacilli      | o__Lactobacillak  | f__Streptococcz                                | g__Streptococcus                           | s__Streptococcus_sp._HTS9                                 |

|        |                    |                          |                       |                       |                                            |                                                                    |
|--------|--------------------|--------------------------|-----------------------|-----------------------|--------------------------------------------|--------------------------------------------------------------------|
| OTU572 | p__Firmicutes      | c__Clostridia            | o__Clostridiales      | f__Ruminococc         | g__Anaerotruncus                           | s__uncultured_bacterium_g__Anaerotruncus                           |
| OTU188 | p__Bacteroidetes   | c__Bacteroidia           | o__Bacteroidales      | f__Bacteroidales      | g__norank_f__Bacteroidales_S24-7_group     | s__uncultured_bacterium_g__norank_f__Bacteroidales_S24-7           |
| OTU18  | p__Firmicutes      | c__Clostridia            | o__Clostridiales      | f__Lachnospira        | g__[Eubacterium]_xylanophilum_group        | s__uncultured_bacterium_g__[Eubacterium]_xylanophilum_g            |
| OTU492 | p__Bacteroidetes   | c__Bacteroidia           | o__Bacteroidales      | f__Bacteroidales      | g__Bacteroides                             | s__unclassified_g__Bacteroides                                     |
| OTU552 | p__Bacteroidetes   | c__Bacteroidia           | o__Bacteroidales      | f__Prevotellace       | g__Prevotellaceae_UCG-001                  | s__unclassified_g__Prevotellaceae_UCG-001                          |
| OTU170 | p__Actinobacteria  | c__Actinobacteria        | o__Coriobacteria      | f__Coriobacteri       | g__unclassified_f__Coriobacteriaceae       | s__unclassified_f__Coriobacteriaceae                               |
| OTU55  | p__Bacteroidetes   | c__Bacteroidia           | o__Bacteroidales      | f__Bacteroidales      | g__norank_f__Bacteroidales_S24-7_group     | s__uncultured_bacterium_g__norank_f__Bacteroidales_S24-7           |
| OTU637 | p__Firmicutes      | c__Clostridia            | o__Clostridiales      | f__Ruminococc         | g__Ruminococcaceae_UCG-014                 | s__uncultured_bacterium_g__Ruminococcaceae_UCG-014                 |
| OTU186 | p__Firmicutes      | c__Clostridia            | o__Clostridiales      | f__Lachnospira        | g__Tyzzerella_3                            | s__uncultured_rumen_bacterium_g__Tyzzerella_3                      |
| OTU223 | p__Firmicutes      | c__Clostridia            | o__Clostridiales      | f__Lachnospira        | g__unclassified_f__Lachnospiraceae         | s__unclassified_f__Lachnospiraceae                                 |
| OTU200 | p__Actinobacteria  | c__Actinobacteria        | o__Coriobacteria      | f__Coriobacteri       | g__Enterorhabdus                           | s__uncultured_bacterium_g__Enterorhabdus                           |
| OTU452 | p__Firmicutes      | c__Clostridia            | o__Clostridiales      | f__Ruminococc         | g__Ruminiclostridium_9                     | s__uncultured_bacterium_g__Ruminiclostridium_9                     |
| OTU667 | p__Firmicutes      | c__Clostridia            | o__Clostridiales      | f__Lachnospira        | g__Lachnospiraceae_NK4A136_group           | s__uncultured_Clostridiales_bacterium_g__Lachnospiraceae_          |
| OTU8   | p__Bacteroidetes   | c__Bacteroidia           | o__Bacteroidales      | f__Bacteroidales      | g__norank_f__Bacteroidales_S24-7_group     | s__uncultured_bacterium_g__norank_f__Bacteroidales_S24-7           |
| OTU340 | p__Bacteroidetes   | c__Bacteroidia           | o__Bacteroidales      | f__Prevotellace       | g__Prevotellaceae_UCG-003                  | s__uncultured_bacterium_g__Prevotellaceae_UCG-003                  |
| OTU493 | p__Firmicutes      | c__Clostridia            | o__Clostridiales      | f__Lachnospira        | g__Lachnospiraceae_NK4A136_group           | s__Lachnospiraceae_bacterium_COE1                                  |
| OTU689 | p__Firmicutes      | c__Clostridia            | o__Clostridiales      | f__Lachnospira        | g__Coproccoccus_1                          | s__unclassified_g__Coproccoccus_1                                  |
| OTU428 | p__Firmicutes      | c__Clostridia            | o__Clostridiales      | f__Ruminococc         | g__unclassified_f__Ruminococcaceae         | s__unclassified_f__Ruminococcaceae                                 |
| OTU40  | p__Firmicutes      | c__Clostridia            | o__Clostridiales      | f__Clostridiales      | g__norank_f__Clostridiales_vadinBB60_group | s__uncultured_bacterium_g__norank_f__Clostridiales_vadinBB60_group |
| OTU444 | p__Firmicutes      | c__Negativicutes         | o__Selenomonadales    | f__Veillonellace      | g__Veillonella                             | s__unclassified_g__Veillonella                                     |
| OTU296 | p__Firmicutes      | c__Clostridia            | o__Clostridiales      | f__Ruminococc         | g__unclassified_f__Ruminococcaceae         | s__unclassified_f__Ruminococcaceae                                 |
| OTU107 | p__Proteobacteria  | c__Betaproteobacteria    | o__Burkholderiales    | f__Alcaligenace       | g__Parasutterella                          | s__Sutterellaceae_bacterium_YL45                                   |
| OTU52  | p__Bacteroidetes   | c__Bacteroidia           | o__Bacteroidales      | f__Bacteroidales      | g__norank_f__Bacteroidales_S24-7_group     | s__uncultured_bacterium_g__norank_f__Bacteroidales_S24-7           |
| OTU58  | p__Firmicutes      | c__Clostridia            | o__Clostridiales      | f__Lachnospira        | g__unclassified_f__Lachnospiraceae         | s__unclassified_f__Lachnospiraceae                                 |
| OTU97  | p__Firmicutes      | c__Erysipelotrichi       | o__Erysipelotrichi    | f__Erysipelotric      | g__Erysipelatoclostridium                  | s__uncultured_bacterium_g__Erysipelatoclostridium                  |
| OTU336 | p__Proteobacteria  | c__Epsilonproteobacteria | o__Campylobacteriales | f__Helicobacter       | g__Helicobacter                            | s__Helicobacter_hepaticus                                          |
| OTU41  | p__Bacteroidetes   | c__Bacteroidia           | o__Bacteroidales      | f__Bacteroidales      | g__norank_f__Bacteroidales_S24-7_group     | s__uncultured_bacterium_g__norank_f__Bacteroidales_S24-7           |
| OTU411 | p__Tenericutes     | c__Mollicutes            | o__Anaeroplasmatales  | f__Anaeroplasmatales  | g__Anaeroplasma                            | s__uncultured_bacterium_g__Anaeroplasma                            |
| OTU225 | p__Bacteroidetes   | c__Bacteroidia           | o__Bacteroidales      | f__Porphyromonadaceae | g__Parabacteroides                         | s__unclassified_g__Parabacteroides                                 |
| OTU153 | p__Firmicutes      | c__Bacilli               | o__Lactobacillales    | f__Lactobacillales    | g__Lactobacillus                           | s__Lactobacillus_ruminis                                           |
| OTU224 | p__Firmicutes      | c__Clostridia            | o__Clostridiales      | f__Ruminococc         | g__unclassified_f__Ruminococcaceae         | s__unclassified_f__Ruminococcaceae                                 |
| OTU139 | p__Firmicutes      | c__Clostridia            | o__Clostridiales      | f__Ruminococc         | g__Ruminococcaceae_UCG-014                 | s__unclassified_g__Ruminococcaceae_UCG-014                         |
| OTU522 | p__Bacteroidetes   | c__Bacteroidia           | o__Bacteroidales      | f__unclassified       | g__unclassified_o__Bacteroidales           | s__unclassified_o__Bacteroidales                                   |
| OTU582 | p__Verrucomicrobia | c__Verrucomicrobia       | o__Verrucomicrobiales | f__Verrucomicrobiales | g__Akkermansia                             | s__Akkermansia_muciniphila                                         |
| OTU389 | p__Bacteroidetes   | c__Bacteroidia           | o__Bacteroidales      | f__Bacteroidales      | g__norank_f__Bacteroidales_S24-7_group     | s__uncultured_bacterium_g__norank_f__Bacteroidales_S24-7           |
| OTU288 | p__Deferritales    | c__Deferritales          | o__Deferritales       | f__Deferritales       | g__Mucispirillum                           | s__Mucispirillum_schaedleri                                        |
| OTU286 | p__Firmicutes      | c__Bacilli               | o__Lactobacillales    | f__Streptococci       | g__Streptococcus                           | s__Streptococcus_danieliae                                         |
| OTU242 | p__Firmicutes      | c__Clostridia            | o__Clostridiales      | f__Lachnospira        | g__unclassified_f__Lachnospiraceae         | s__unclassified_f__Lachnospiraceae                                 |
| OTU591 | p__Firmicutes      | c__Clostridia            | o__Clostridiales      | f__Lachnospira        | g__norank_f__Lachnospiraceae               | s__unclassified_g__norank_f__Lachnospiraceae                       |

|        |                                                                                                          |                                                           |
|--------|----------------------------------------------------------------------------------------------------------|-----------------------------------------------------------|
| OTU106 | p__Tenericutes c__Mollicutes o__Mollicutes_R f__norank_o__l g__norank_o__Mollicutes_RF9                  | s__uncultured_bacterium_g__norank_o__Mollicutes_RF9       |
| OTU128 | p__Bacteroidetes c__Bacteroidia o__Bacteroidales f__Prevotellace g__Prevotellaceae_UCG-001               | s__uncultured_Bacteroidales_bacterium_g__Prevotellaceae_U |
| OTU190 | p__Bacteroidetes c__Bacteroidia o__Bacteroidales f__Prevotellace g__Prevotellaceae_UCG-001               | s__uncultured_Bacteroidales_bacterium_g__Prevotellaceae_U |
| OTU540 | p__Firmicutes c__Clostridia o__Clostridiales f__Lachnospira g__Roseburia                                 | s__Clostridium_sp._Clone-44                               |
| OTU86  | p__Actinobacte c__Actinobacte o__Coriobacteria f__Coriobacteri g__unclassified_f__Coriobacteriaceae      | s__unclassified_f__Coriobacteriaceae                      |
| OTU463 | p__Firmicutes c__Clostridia o__Clostridiales f__Lachnospira g__norank_f__Lachnospiraceae                 | s__uncultured_bacterium_g__norank_f__Lachnospiraceae      |
| OTU17  | p__Bacteroidetes c__Bacteroidia o__Bacteroidales f__Bacteroidale g__norank_f__Bacteroidales_S24-7_group  | s__uncultured_bacterium_g__norank_f__Bacteroidales_S24-7  |
| OTU10  | p__Bacteroidetes c__Bacteroidia o__Bacteroidales f__Bacteroidale g__norank_f__Bacteroidales_S24-7_group  | s__uncultured_Bacteroidales_bacterium_g__norank_f__Bacte  |
| OTU608 | p__Bacteroidetes c__Bacteroidia o__Bacteroidales f__Bacteroidale g__norank_f__Bacteroidales_S24-7_group  | s__uncultured_Barnesiella_sp._g__norank                   |
| OTU205 | p__Firmicutes c__Clostridia o__Clostridiales f__Ruminococc g__Anaerotruncus                              | s__uncultured_bacterium_g__Anaerotruncus                  |
| OTU327 | p__Firmicutes c__Clostridia o__Clostridiales f__Ruminococc g__norank_f__Ruminococcaceae                  | s__[Clostridium]_leptum_g__norank                         |
| OTU232 | p__Bacteroidetes c__Bacteroidia o__Bacteroidales f__Bacteroidace g__Bacteroides                          | s__Bacteroides_plebeius                                   |
| OTU37  | p__Firmicutes c__Clostridia o__Clostridiales f__Ruminococc g__Ruminococcaceae_UCG-014                    | s__unclassified_g__Ruminococcaceae_UCG-014                |
| OTU579 | p__Bacteroidetes c__Bacteroidia o__Bacteroidales f__Bacteroidale g__norank_f__Bacteroidales_S24-7_group  | s__uncultured_bacterium_g__norank_f__Bacteroidales_S24-7  |
| OTU275 | p__Bacteroidetes c__Bacteroidia o__Bacteroidales f__Prevotellace g__Alloprevotella                       | s__uncultured_Bacteroidales_bacterium_g__Alloprevotella   |
| OTU19  | p__Proteobacte c__Alphaprotec o__Rhodospirilla f__Rhodospirill g__norank_f__Rhodospirillaceae            | s__gut_metagenome_g__norank_f__Rhodospirillaceae          |
| OTU45  | p__Actinobacte c__Actinobacte o__Coriobacteria f__Coriobacteri g__Senegalimassilia                       | s__unclassified_g__Senegalimassilia                       |
| OTU206 | p__Bacteroidetes c__Bacteroidia o__Bacteroidales f__Bacteroidale g__norank_f__Bacteroidales_S24-7_group  | s__uncultured_bacterium_g__norank_f__Bacteroidales_S24-7  |
| OTU652 | p__Firmicutes c__Clostridia o__Clostridiales f__Lachnospira g__unclassified_f__Lachnospiraceae           | s__unclassified_f__Lachnospiraceae                        |
| OTU460 | p__Tenericutes c__Mollicutes o__Mollicutes_R f__norank_o__l g__norank_o__Mollicutes_RF9                  | s__uncultured_Firmicutes_bacterium_g__norank_o__Mollicu   |
| OTU503 | p__Bacteroidetes c__Bacteroidia o__Bacteroidales f__Bacteroidace g__Bacteroides                          | s__unclassified_g__Bacteroides                            |
| OTU707 | p__Bacteroidetes c__Bacteroidia o__Bacteroidales f__Bacteroidale g__norank_f__Bacteroidales_S24-7_group  | s__uncultured_Bacteroidales_bacterium_g__norank_f__Bacte  |
| OTU465 | p__Firmicutes c__Clostridia o__Clostridiales f__Lachnospira g__Lachnospiraceae_NK4A136_group             | s__unclassified_g__Lachnospiraceae_NK4A136_group          |
| OTU25  | p__Cyanobacte c__Cyanobacte o__Gastranaerop f__norank_o__(g__norank_o__Gastranaerophilales               | s__uncultured_bacterium_g__norank_o__Gastranaerophilales  |
| OTU277 | p__Firmicutes c__Clostridia o__Clostridiales f__Lachnospira g__unclassified_f__Lachnospiraceae           | s__unclassified_f__Lachnospiraceae                        |
| OTU87  | p__Cyanobacte c__Cyanobacte o__Gastranaerop f__norank_o__(g__norank_o__Gastranaerophilales               | s__uncultured_bacterium_g__norank_o__Gastranaerophilales  |
| OTU104 | p__Bacteroidetes c__Bacteroidia o__Bacteroidales f__Bacteroidale g__norank_f__Bacteroidales_S24-7_group  | s__uncultured_bacterium_g__norank_f__Bacteroidales_S24-7  |
| OTU557 | p__Bacteroidetes c__Bacteroidia o__Bacteroidales f__Bacteroidale g__norank_f__Bacteroidales_S24-7_group  | s__unclassified_g__norank_f__Bacteroidales_S24-7_group    |
| OTU643 | p__Firmicutes c__Clostridia o__Clostridiales f__Ruminococc g__Ruminococcaceae_UCG-014                    | s__unclassified_g__Ruminococcaceae_UCG-014                |
| OTU545 | p__Firmicutes c__Clostridia o__Clostridiales f__Lachnospira g__Lachnospiraceae_NK4A136_group             | s__unclassified_g__Lachnospiraceae_NK4A136_group          |
| OTU187 | p__Bacteroidetes c__Bacteroidia o__Bacteroidales f__Rikenellaceae g__Rikenellaceae_RC9_gut_group         | s__unclassified_g__Rikenellaceae_RC9_gut_group            |
| OTU368 | p__Firmicutes c__Clostridia o__Clostridiales f__Family_XIII g__Family_XIII_AD3011_group                  | s__unclassified_g__Family_XIII_AD3011_group               |
| OTU419 | p__Firmicutes c__Clostridia o__Clostridiales f__Lachnospira g__unclassified_f__Lachnospiraceae           | s__unclassified_f__Lachnospiraceae                        |
| OTU226 | p__Bacteroidetes c__Bacteroidia o__Bacteroidales f__Bacteroidale g__norank_f__Bacteroidales_S24-7_group  | s__uncultured_bacterium_g__norank_f__Bacteroidales_S24-7  |
| OTU650 | p__Bacteroidetes c__Bacteroidia o__Bacteroidales f__Bacteroidale g__norank_f__Bacteroidales_S24-7_group  | s__uncultured_bacterium_g__norank_f__Bacteroidales_S24-7  |
| OTU619 | p__Cyanobacte c__Cyanobacte o__Gastranaerop f__norank_o__(g__norank_o__Gastranaerophilales               | s__uncultured_bacterium_g__norank_o__Gastranaerophilales  |
| OTU710 | p__Firmicutes c__Clostridia o__Clostridiales f__Ruminococc g__Ruminiclostridium_5                        | s__uncultured_bacterium_g__Ruminiclostridium_5            |
| OTU455 | p__Firmicutes c__Negativicut o__Selenomonad f__Veillonellac g__Veillonella                               | s__unclassified_g__Veillonella                            |
| OTU596 | p__Firmicutes c__Clostridia o__Clostridiales f__Clostridiales g__norank_f__Clostridiales_vadinBB60_group | s__unclassified_g__norank_f__Clostridiales_vadinBB60_groi |



|        |                   |                    |                        |                                                 |                                            |                                                                              |
|--------|-------------------|--------------------|------------------------|-------------------------------------------------|--------------------------------------------|------------------------------------------------------------------------------|
| OTU244 | p__Firmicutes     | c__Clostridia      | o__Clostridiales       | f__Ruminococc                                   | g__norank_f__Ruminococcaceae               | s__unclassified_g__norank_f__Ruminococcaceae                                 |
| OTU196 | p__Bacteroidetes  | c__Bacteroidia     | o__Bacteroidales       | f__Rikenellaceae                                | g__Alistipes                               | s__uncultured_bacterium_g__Alistipes                                         |
| OTU458 | p__Tenericutes    | c__Mollicutes      | o__Mollicutes_RF       | f__norank_o__l_g__norank_o__Mollicutes_RF9      |                                            | s__uncultured_bacterium_g__norank_o__Mollicutes_RF9                          |
| OTU614 | p__Bacteroidetes  | c__Bacteroidia     | o__Bacteroidales       | f__Bacteroidales                                | g__norank_f__Bacteroidales_S24-7_group     | s__uncultured_bacterium_g__norank_f__Bacteroidales_S24-7_group               |
| OTU33  | p__Tenericutes    | c__Mollicutes      | o__Mollicutes_RF       | f__norank_o__l_g__norank_o__Mollicutes_RF9      |                                            | s__uncultured_bacterium_g__norank_o__Mollicutes_RF9                          |
| OTU587 | p__Bacteroidetes  | c__Bacteroidia     | o__Bacteroidales       | f__Bacteroidales                                | g__norank_f__Bacteroidales_S24-7_group     | s__uncultured_Bacteroidales_bacterium_g__norank_f__Bacteroidales_S24-7_group |
| OTU16  | p__Tenericutes    | c__Mollicutes      | o__Mollicutes_RF       | f__norank_o__l_g__norank_o__Mollicutes_RF9      |                                            | s__unclassified_g__norank_o__Mollicutes_RF9                                  |
| OTU457 | p__Firmicutes     | c__Clostridia      | o__Clostridiales       | f__Lachnospiraceae                              | g__norank_f__Lachnospiraceae               | s__unclassified_g__norank_f__Lachnospiraceae                                 |
| OTU488 | p__Bacteroidetes  | c__Bacteroidia     | o__Bacteroidales       | f__Bacteroidales                                | g__norank_f__Bacteroidales_S24-7_group     | s__uncultured_bacterium_g__norank_f__Bacteroidales_S24-7_group               |
| OTU386 | p__Bacteroidetes  | c__Bacteroidia     | o__Bacteroidales       | f__Prevotellaceae                               | g__Prevotellaceae_UCG-003                  | s__uncultured_bacterium_g__Prevotellaceae_UCG-003                            |
| OTU528 | p__Firmicutes     | c__Erysipelotrichi | o__Erysipelotrichi     | f__Erysipelotrichi                              | g__Erysipelatoclostridium                  | s__unclassified_g__Erysipelatoclostridium                                    |
| OTU279 | p__Firmicutes     | c__Bacilli         | o__Lactobacillales     | f__Streptococcaceae                             | g__Lactococcus                             | s__uncultured_bacterium_g__Lactococcus                                       |
| OTU709 | p__Firmicutes     | c__Clostridia      | o__Clostridiales       | f__Ruminococc                                   | g__Ruminiclostridium_6                     | s__uncultured_bacterium_g__Ruminiclostridium_6                               |
| OTU7   | p__Tenericutes    | c__Mollicutes      | o__Mollicutes_RF       | f__norank_o__l_g__norank_o__Mollicutes_RF9      |                                            | s__uncultured_bacterium_g__norank_o__Mollicutes_RF9                          |
| OTU24  | p__Bacteroidetes  | c__Bacteroidia     | o__Bacteroidales       | f__Bacteroidales                                | g__norank_f__Bacteroidales_S24-7_group     | s__uncultured_bacterium_g__norank_f__Bacteroidales_S24-7_group               |
| OTU56  | p__Firmicutes     | c__Clostridia      | o__Clostridiales       | f__Ruminococc                                   | g__Anaerotruncus                           | s__[Clostridium]_leptum_g__Anaerotruncus                                     |
| OTU116 | p__Actinobacteria | c__Actinobacteria  | o__Coriobacteriales    | f__Coriobacteriales                             | g__Enterorhabdus                           | s__uncultured_bacterium_g__Enterorhabdus                                     |
| OTU75  | p__Firmicutes     | c__Clostridia      | o__Clostridiales       | f__Ruminococc                                   | g__unclassified_f__Ruminococcaceae         | s__unclassified_f__Ruminococcaceae                                           |
| OTU413 | p__Cyanobacteria  | c__Cyanobacteria   | o__Gastranaerophilales | f__norank_o__l_g__norank_o__Gastranaerophilales |                                            | s__uncultured_bacterium_g__norank_o__Gastranaerophilales                     |
| OTU181 | p__Firmicutes     | c__Clostridia      | o__Clostridiales       | f__Family_XIII                                  | g__Family_XIII_AD3011_group                | s__unclassified_g__Family_XIII_AD3011_group                                  |
| OTU603 | p__Firmicutes     | c__Clostridia      | o__Clostridiales       | f__Family_XIII                                  | g__[Eubacterium]_brachy_group              | s__uncultured_bacterium_g__[Eubacterium]_brachy_group                        |
| OTU67  | p__Firmicutes     | c__Clostridia      | o__Clostridiales       | f__Ruminococc                                   | g__Ruminococcaceae_UCG-009                 | s__unclassified_g__Ruminococcaceae_UCG-009                                   |
| OTU502 | p__Firmicutes     | c__Clostridia      | o__Clostridiales       | f__Lachnospiraceae                              | g__Lachnospiraceae_NK4A136_group           | s__uncultured_bacterium_g__Lachnospiraceae_NK4A136_group                     |
| OTU357 | p__Firmicutes     | c__Erysipelotrichi | o__Erysipelotrichi     | f__Erysipelotrichi                              | g__unclassified_f__Erysipelotrichaceae     | s__unclassified_f__Erysipelotrichaceae                                       |
| OTU124 | p__Firmicutes     | c__Clostridia      | o__Clostridiales       | f__Lachnospiraceae                              | g__norank_f__Lachnospiraceae               | s__Lachnospiraceae_bacterium_A2                                              |
| OTU160 | p__Firmicutes     | c__Clostridia      | o__Clostridiales       | f__Ruminococc                                   | g__unclassified_f__Ruminococcaceae         | s__unclassified_f__Ruminococcaceae                                           |
| OTU479 | p__Firmicutes     | c__Clostridia      | o__Clostridiales       | f__Lachnospiraceae                              | g__unclassified_f__Lachnospiraceae         | s__unclassified_f__Lachnospiraceae                                           |
| OTU34  | p__Bacteroidetes  | c__Bacteroidia     | o__Bacteroidales       | f__Bacteroidales                                | g__norank_f__Bacteroidales_S24-7_group     | s__uncultured_bacterium_g__norank_f__Bacteroidales_S24-7_group               |
| OTU438 | p__Firmicutes     | c__Clostridia      | o__Clostridiales       | f__Clostridiales                                | g__norank_f__Clostridiales_vadinBB60_group | s__unclassified_g__norank_f__Clostridiales_vadinBB60_group                   |
| OTU666 | p__Firmicutes     | c__Clostridia      | o__Clostridiales       | f__Clostridiales                                | g__norank_f__Clostridiales_vadinBB60_group | s__unclassified_g__norank_f__Clostridiales_vadinBB60_group                   |
| OTU233 | p__Firmicutes     | c__Clostridia      | o__Clostridiales       | f__Lachnospiraceae                              | g__Acetatifactor                           | s__uncultured_bacterium_g__Acetatifactor                                     |
| OTU392 | p__Firmicutes     | c__Clostridia      | o__Clostridiales       | f__Lachnospiraceae                              | g__Roseburia                               | s__unclassified_g__Roseburia                                                 |
| OTU251 | p__Actinobacteria | c__Actinobacteria  | o__Coriobacteriales    | f__Coriobacteriales                             | g__Enterorhabdus                           | s__uncultured_bacterium_g__Enterorhabdus                                     |
| OTU484 | p__Firmicutes     | c__Clostridia      | o__Clostridiales       | f__Lachnospiraceae                              | g__unclassified_f__Lachnospiraceae         | s__unclassified_f__Lachnospiraceae                                           |
| OTU515 | p__Bacteroidetes  | c__Bacteroidia     | o__Bacteroidales       | f__Rikenellaceae                                | g__Rikenellaceae_RC9_gut_group             | s__uncultured_bacterium_g__Rikenellaceae_RC9_gut_group                       |
| OTU433 | p__Firmicutes     | c__Clostridia      | o__Clostridiales       | f__Lachnospiraceae                              | g__Acetatifactor                           | s__unclassified_g__Acetatifactor                                             |
| OTU241 | p__Firmicutes     | c__Clostridia      | o__Clostridiales       | f__Lachnospiraceae                              | g__unclassified_f__Lachnospiraceae         | s__unclassified_f__Lachnospiraceae                                           |
| OTU229 | p__Firmicutes     | c__Clostridia      | o__Clostridiales       | f__Ruminococc                                   | g__Anaerotruncus                           | s__uncultured_bacterium_g__Anaerotruncus                                     |
| OTU189 | p__Bacteroidetes  | c__Bacteroidia     | o__Bacteroidales       | f__Bacteroidales                                | g__norank_f__Bacteroidales_S24-7_group     | s__uncultured_bacterium_g__norank_f__Bacteroidales_S24-7_group               |

|        |                |                 |                   |                  |                                        |                                                          |
|--------|----------------|-----------------|-------------------|------------------|----------------------------------------|----------------------------------------------------------|
| OTU38  | p__Firmicutes  | c__Erysipelotri | o__Erysipelotricl | f__Erysipelotric | g__[Clostridium]_innocuum_group        | s__uncultured_bacterium_g__[Clostridium]_innocuum_group  |
| OTU406 | p__Actinobacte | c__Actinobacte  | o__Coriobacteria  | f__Coriobacteri  | g__Enterorhabdus                       | s__uncultured_bacterium_g__Enterorhabdus                 |
| OTU118 | p__Firmicutes  | c__Clostridia   | o__Clostridiales  | f__Lachnospira   | g__Roseburia                           | s__unclassified_g__Roseburia                             |
| OTU168 | p__Proteobacte | c__Deltaproteo  | o__Desulfovibric  | f__Desulfovibri  | g__Desulfovibrio                       | s__uncultured_Desulfovibrionaceae_bacterium              |
| OTU481 | p__Firmicutes  | c__Clostridia   | o__Clostridiales  | f__Lachnospira   | g__Lachnospiraceae_NK4A136_group       | s__unclassified_g__Lachnospiraceae_NK4A136_group         |
| OTU85  | p__Actinobacte | c__Actinobacte  | o__Coriobacteria  | f__Coriobacteri  | g__norank_f__Coriobacteriaceae         | s__gut_metagenome_g__norank                              |
| OTU711 | p__Firmicutes  | c__Clostridia   | o__Clostridiales  | f__Lachnospira   | g__Lachnospiraceae_UCG-006             | s__uncultured_bacterium_g__Lachnospiraceae_UCG-006       |
| OTU414 | p__Tenericutes | c__Mollicutes   | o__Mollicutes_R   | f__norank_o__l   | g__norank_o__Mollicutes_RF9            | s__uncultured_bacterium_g__norank_o__Mollicutes_RF9      |
| OTU633 | p__Bacteroidet | c__Bacteroidia  | o__Bacteroidales  | f__Bacteroidale  | g__norank_f__Bacteroidales_S24-7_group | s__unclassified_g__norank_f__Bacteroidales_S24-7_group   |
| OTU653 | p__Firmicutes  | c__Clostridia   | o__Clostridiales  | f__Lachnospira   | g__unclassified_f__Lachnospiraceae     | s__unclassified_f__Lachnospiraceae                       |
| OTU482 | p__Bacteroidet | c__Bacteroidia  | o__Bacteroidales  | f__Bacteroidale  | g__norank_f__Bacteroidales_S24-7_group | s__uncultured_bacterium_g__norank_f__Bacteroidales_S24-7 |
| OTU602 | p__Firmicutes  | c__Clostridia   | o__Clostridiales  | f__Lachnospira   | g__Roseburia                           | s__uncultured_Clostridiales_bacterium_g__Roseburia       |
| OTU671 | p__Firmicutes  | c__Clostridia   | o__Clostridiales  | f__Lachnospira   | g__Roseburia                           | s__Eubacterium_sp._14-2                                  |

Abbreviations: OTU: operational taxonomic unit; CSDS: chronic social defeated stress.



























idiales\_vadinBB60\_group
